# Supplementary material for: SHMT2 Promotes Gastric Cancer Development through Regulation of HIF1α/VEGF/STAT3 Signaling
Source: MDPI journal article supplement (doi:10.3390/ijms24087150), 2023-04-12

# Figure S2-1

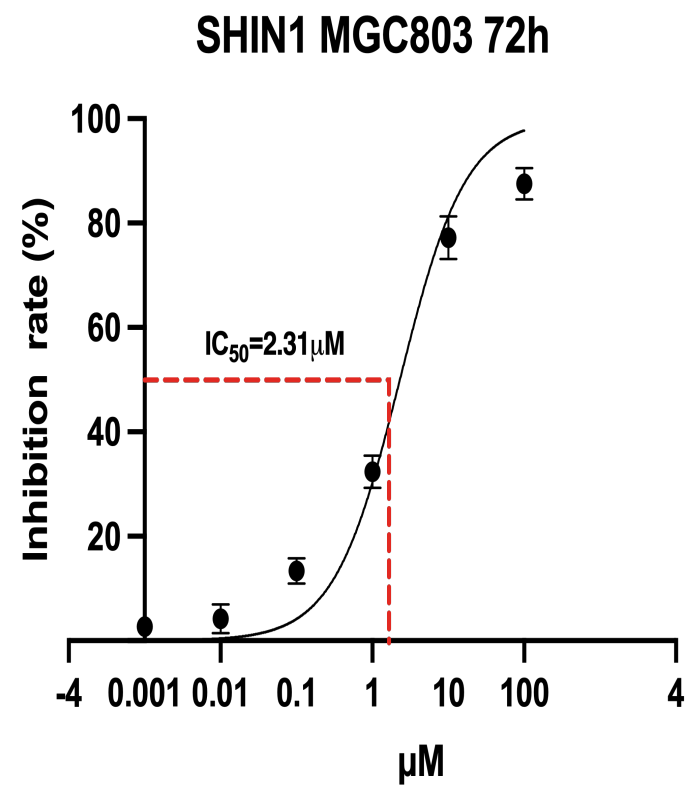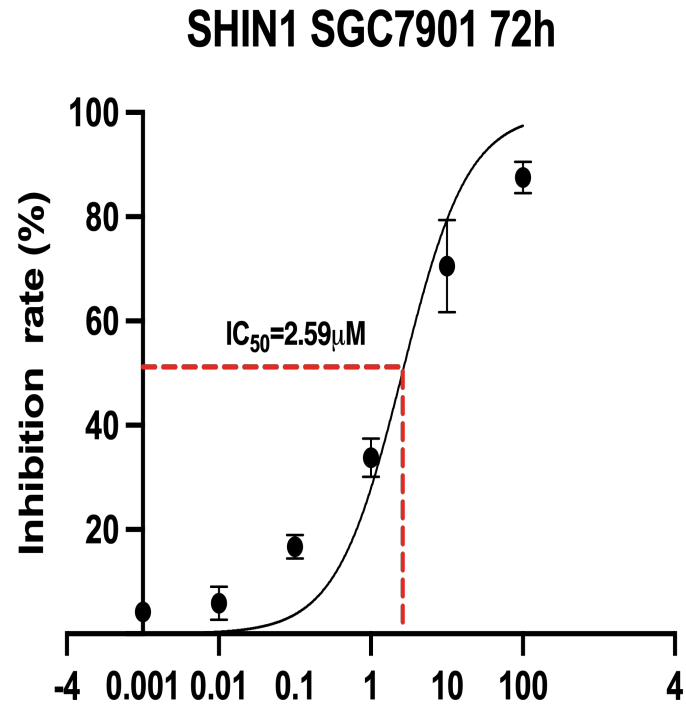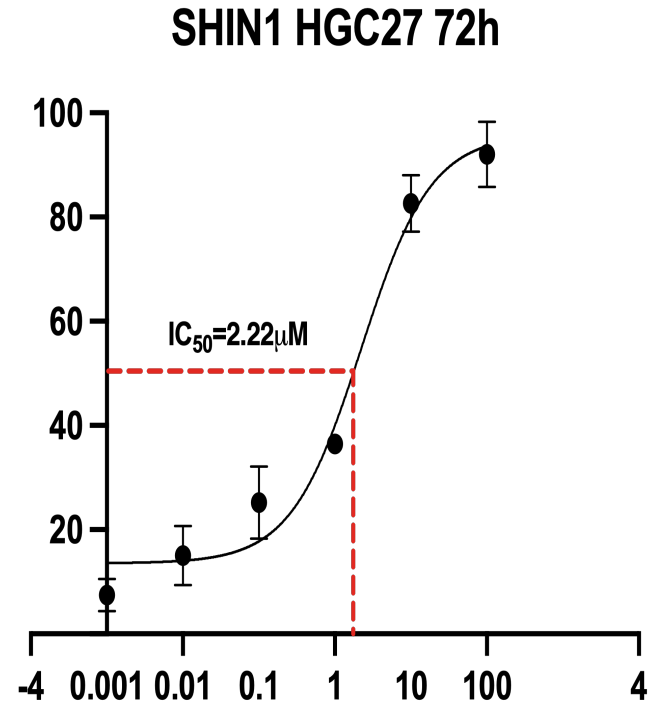

# Figure S2-2

SGC7901

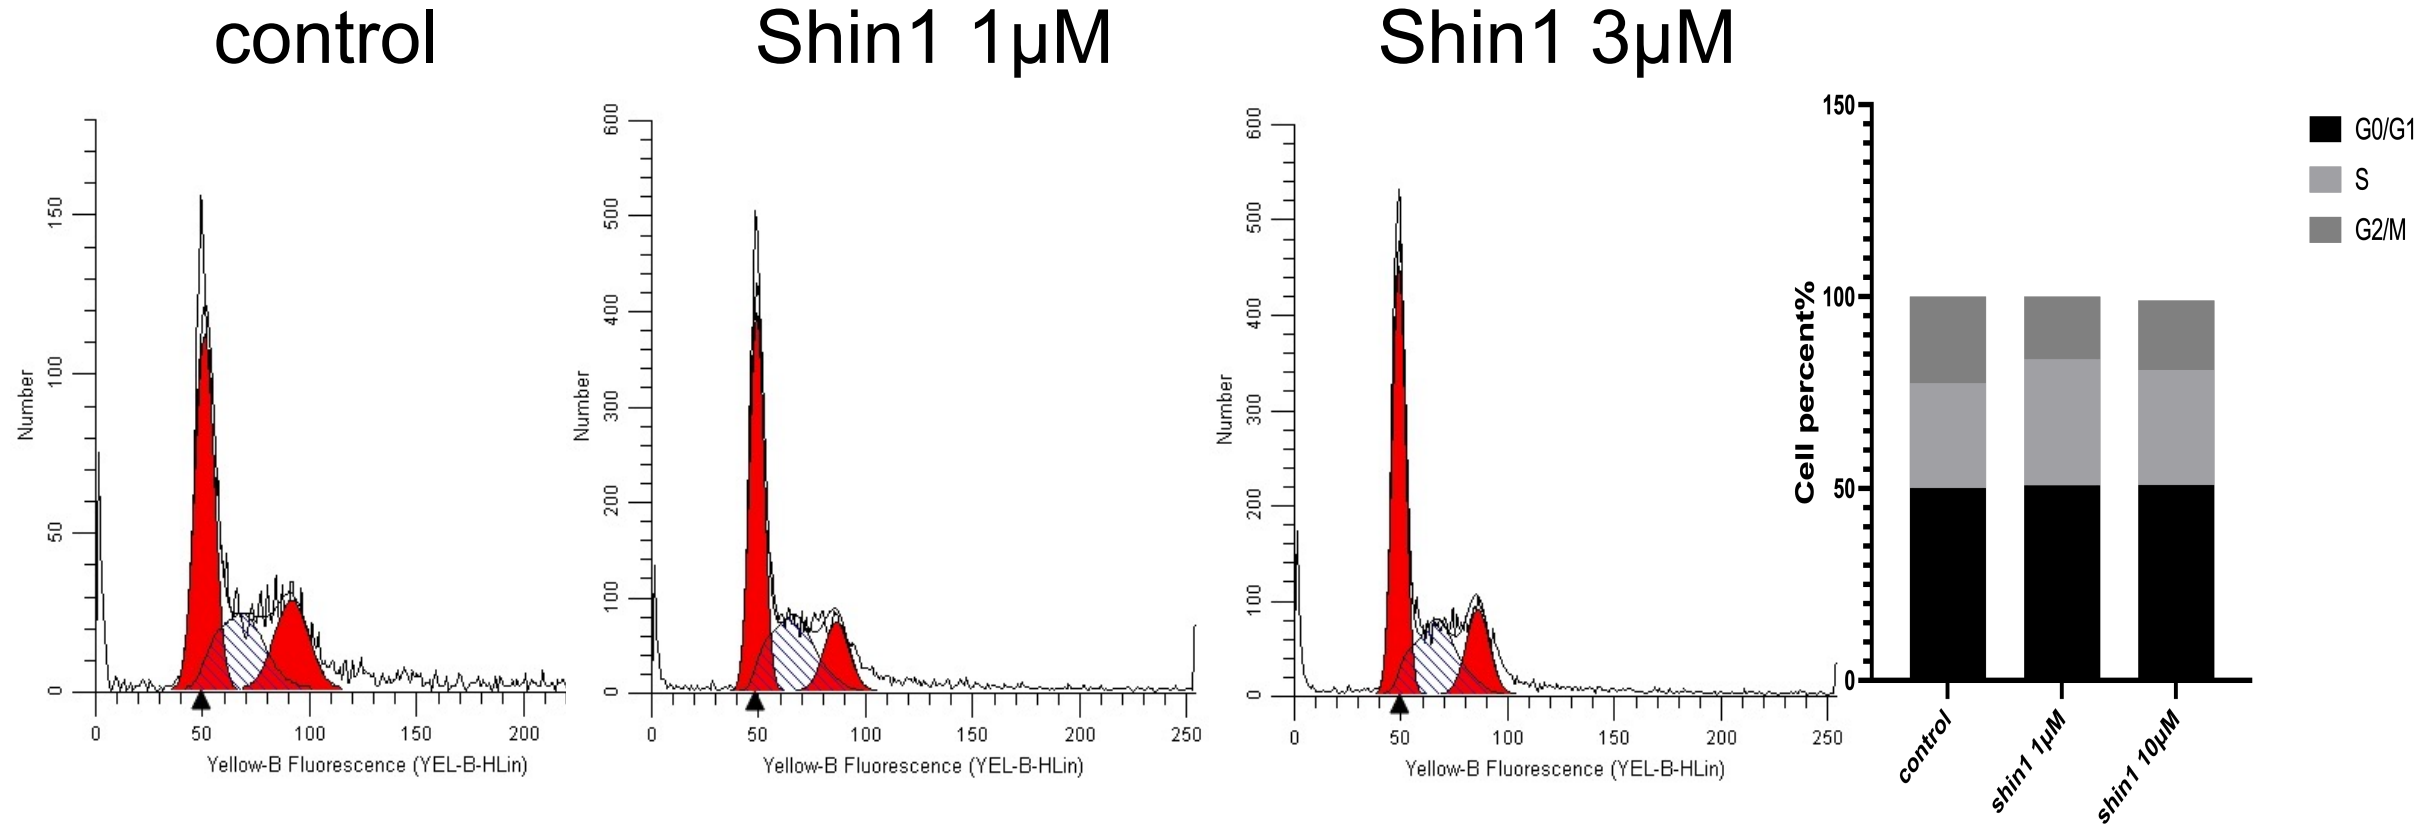

# Figure S2-3

SGC7901

control

Shin1 1 $\mu$ M

Shin1 3 $\mu$ M

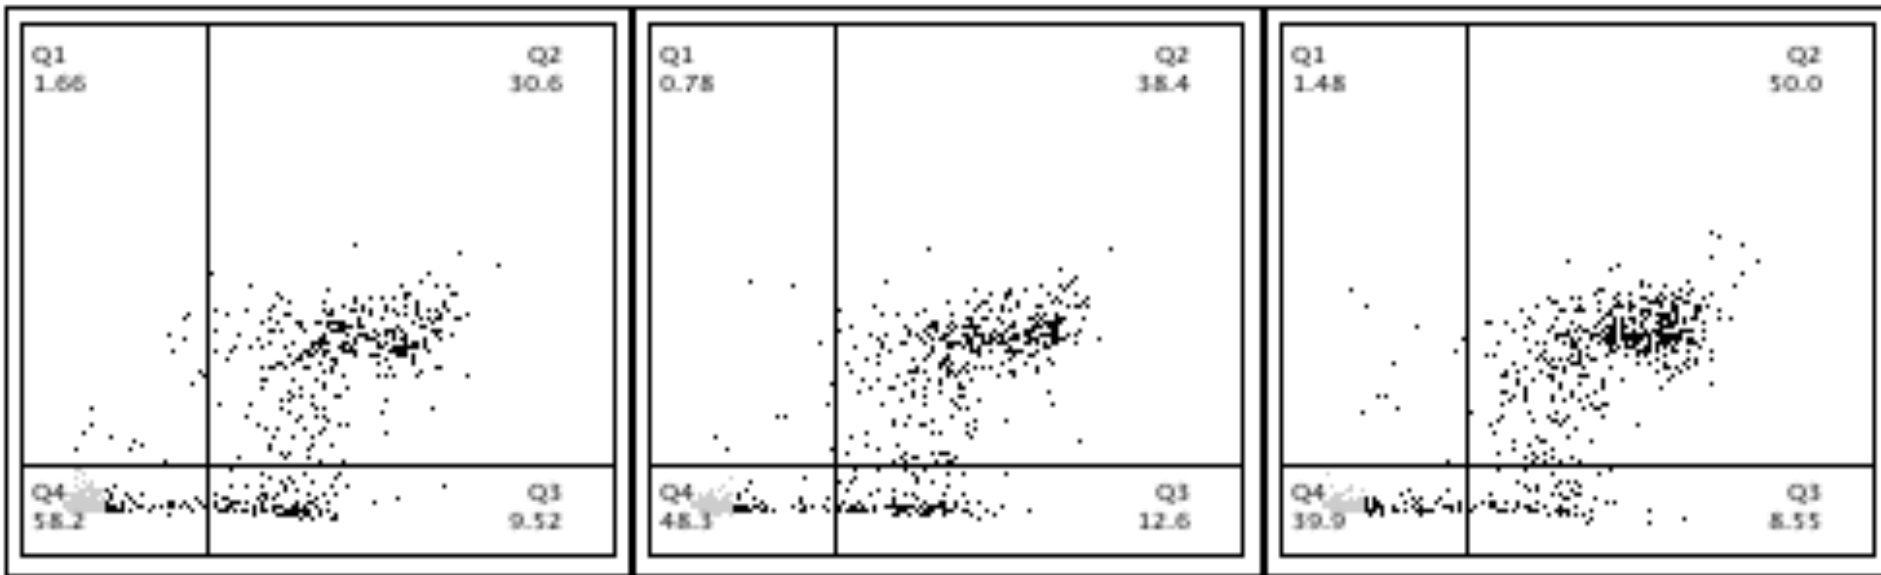

**SHIN1 Apoptosis**

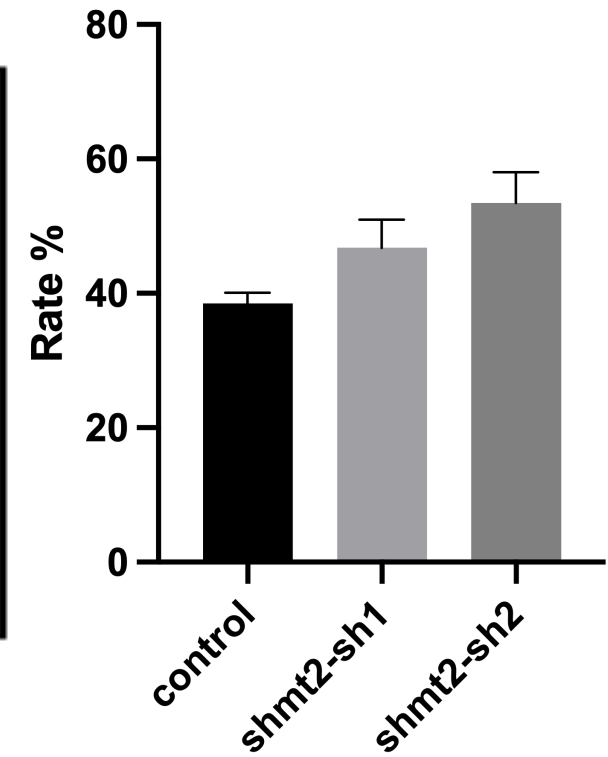

Figure S4-1

SGC7901

*Hypoxia*

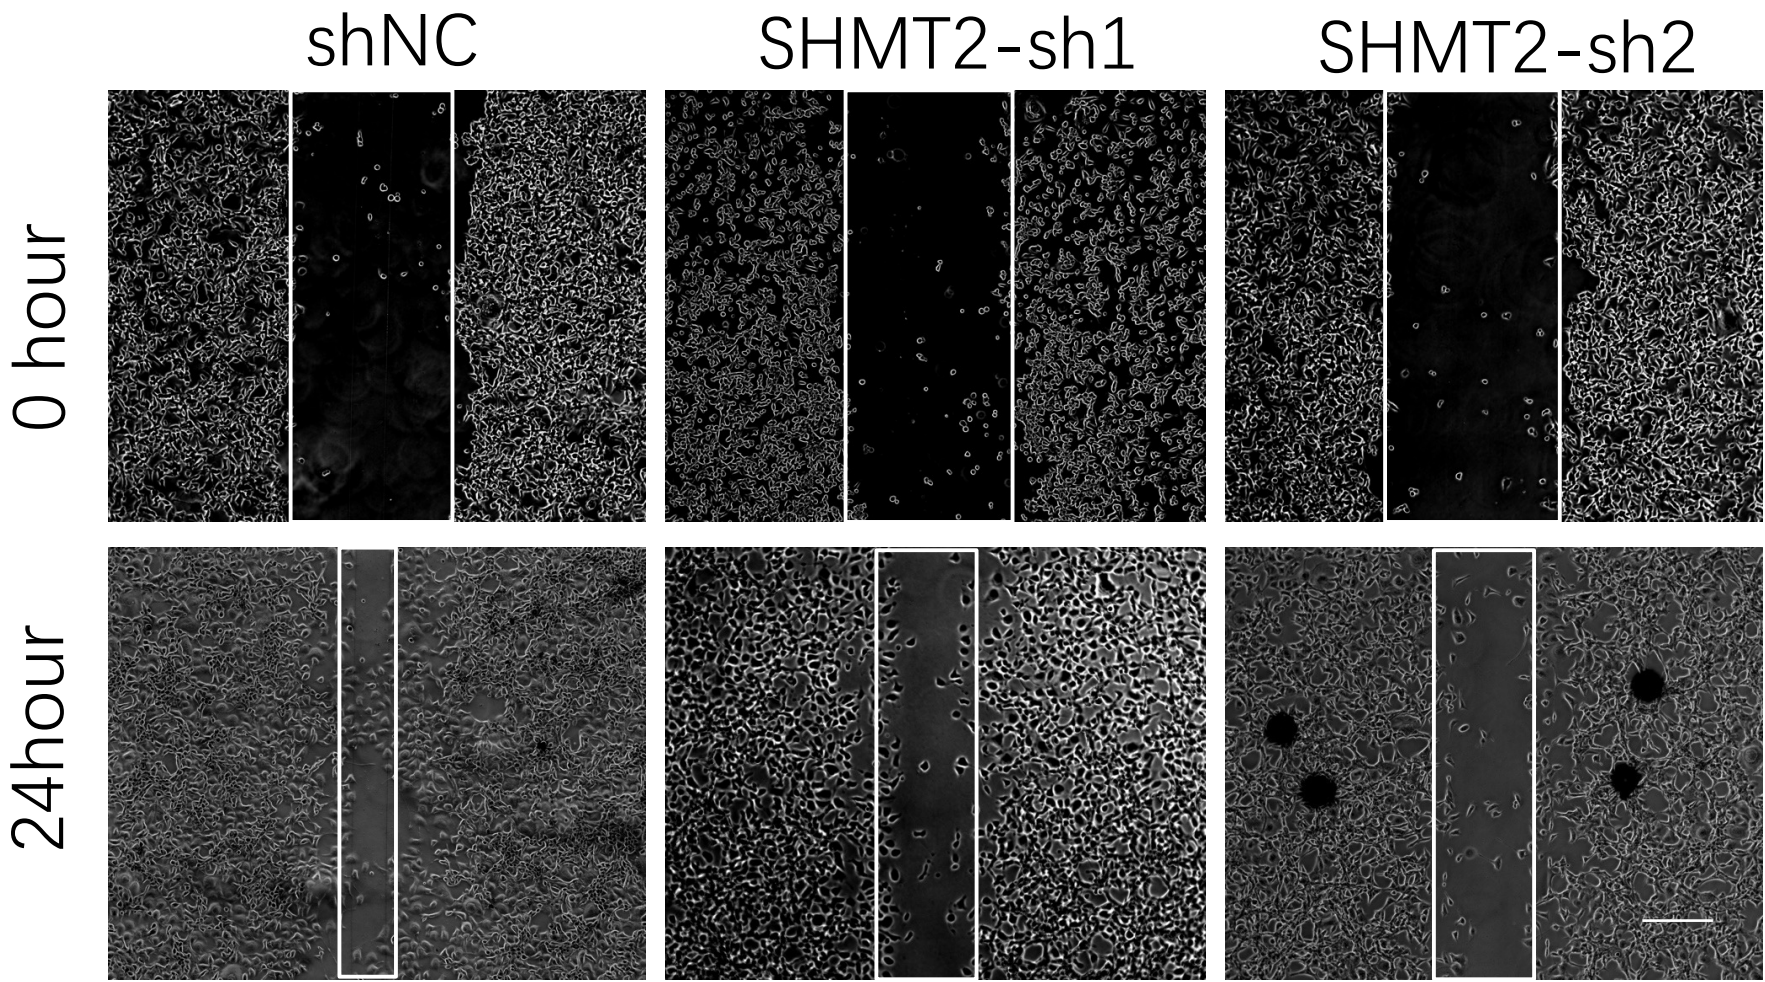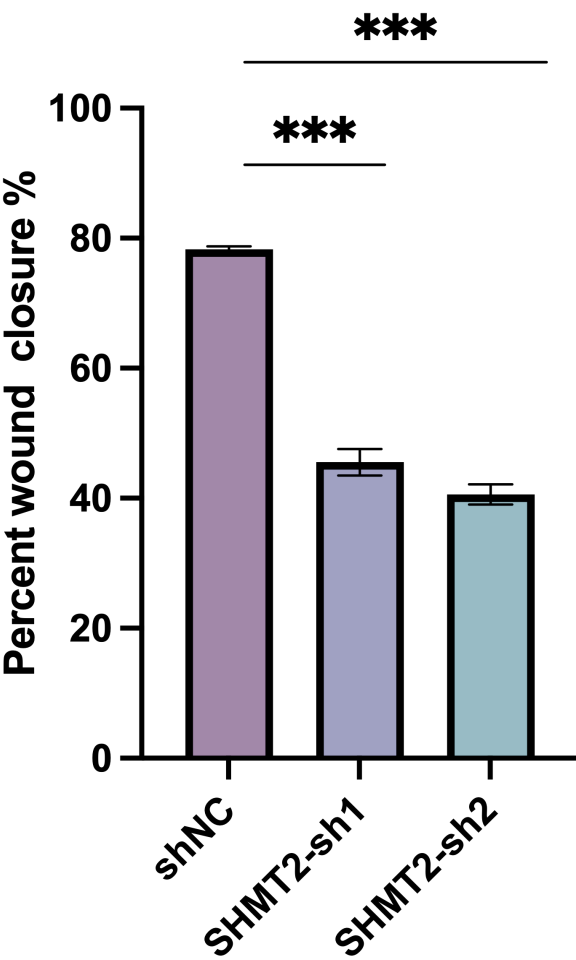



Figure S4-2

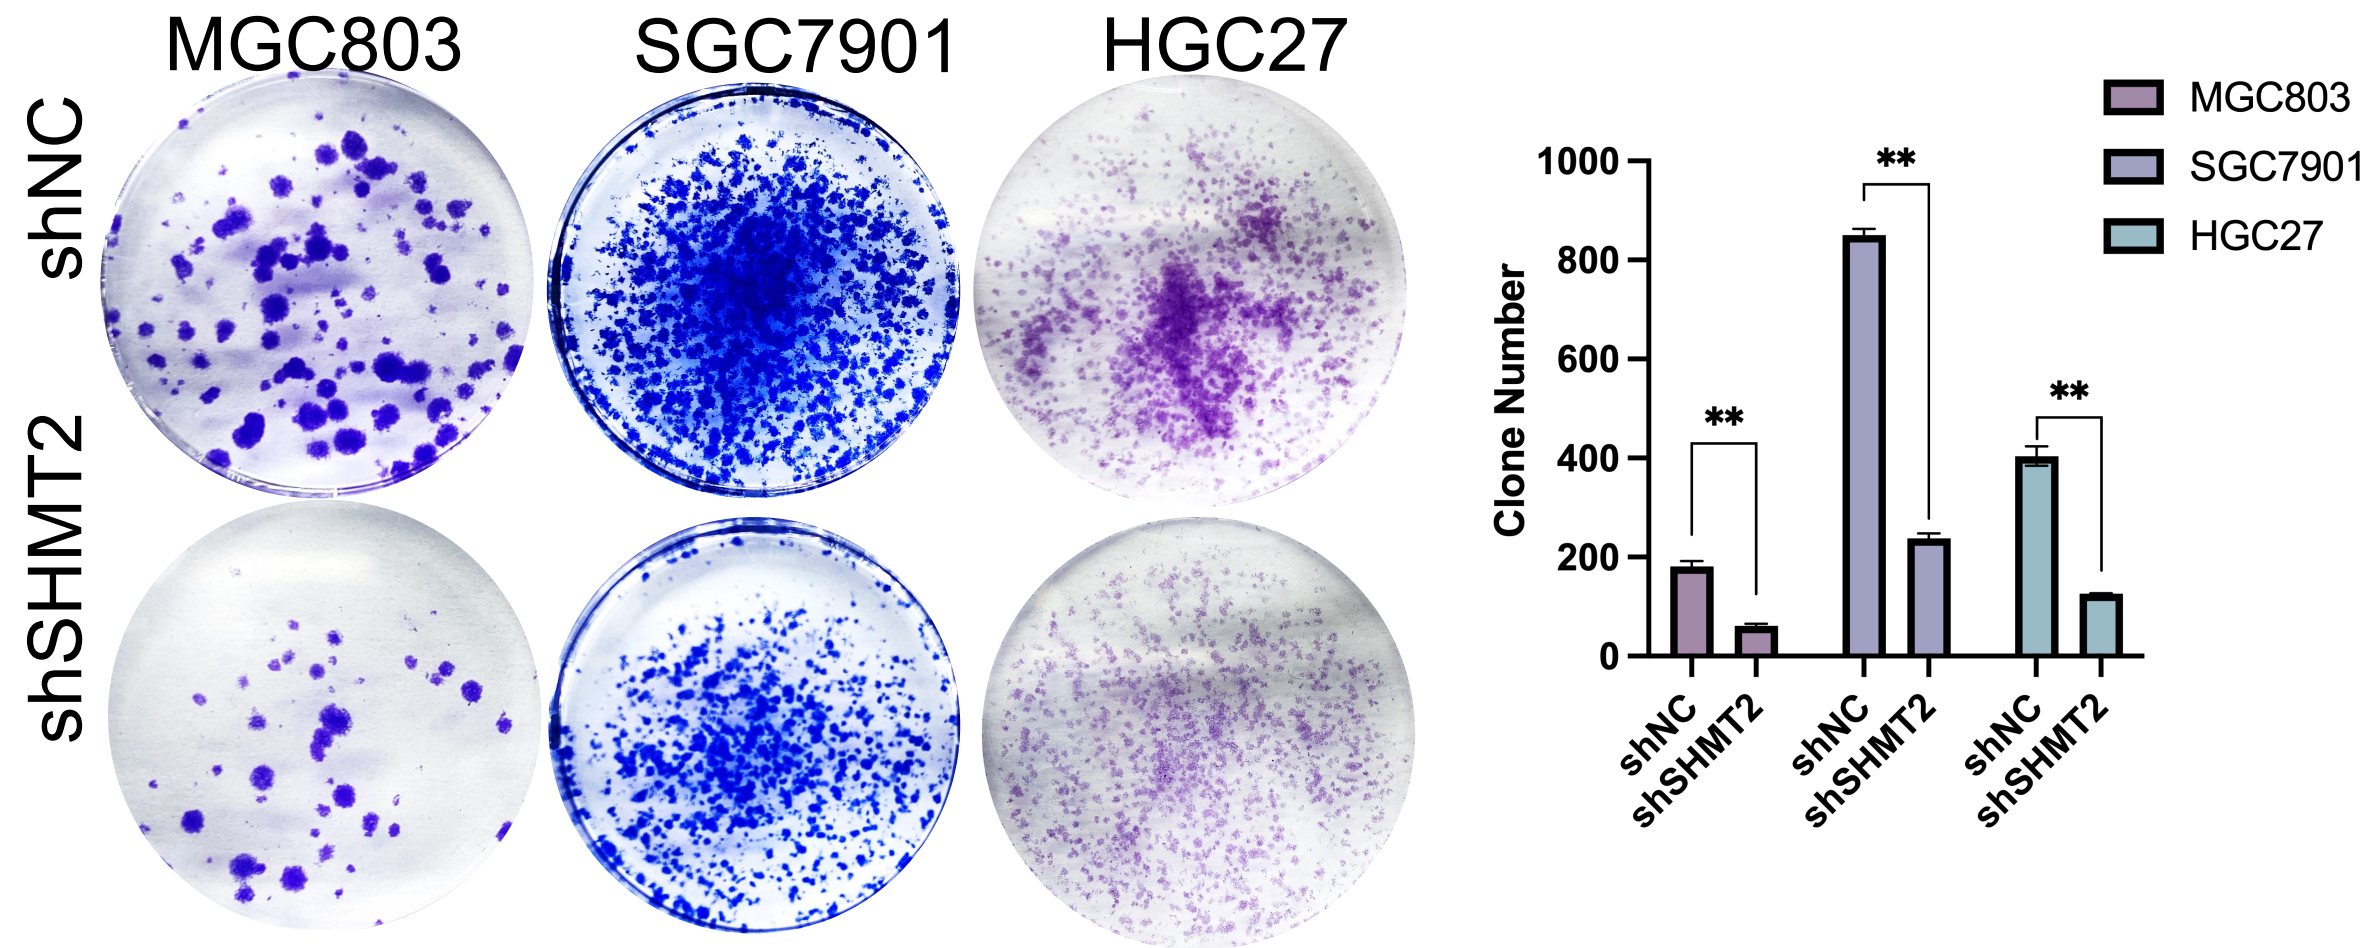

Figure S5-1

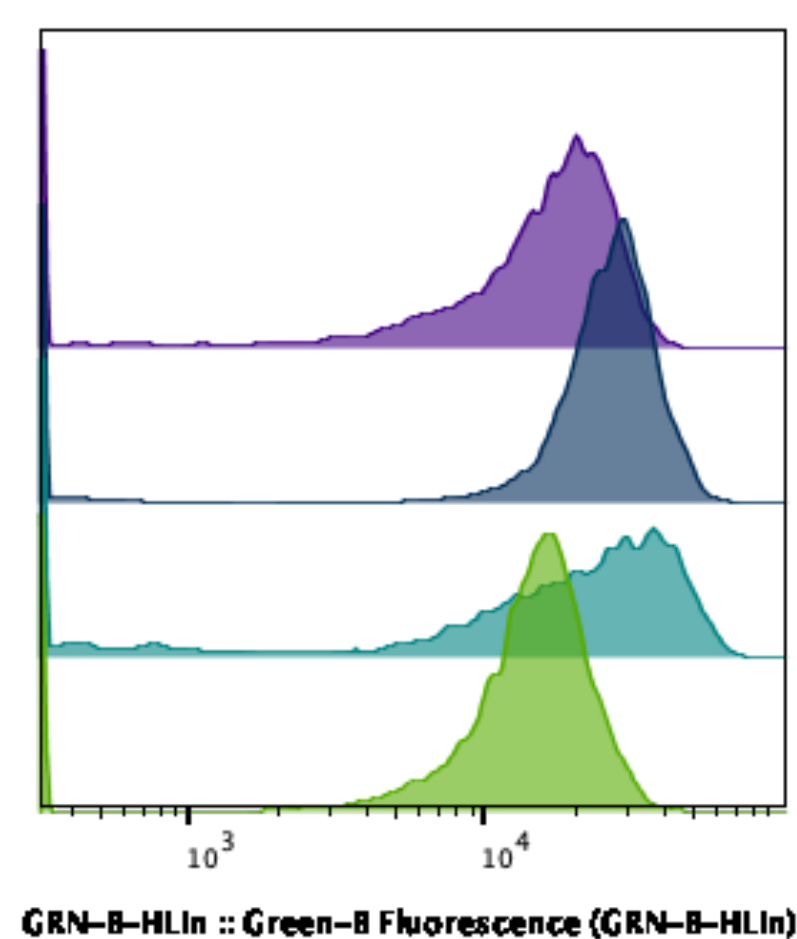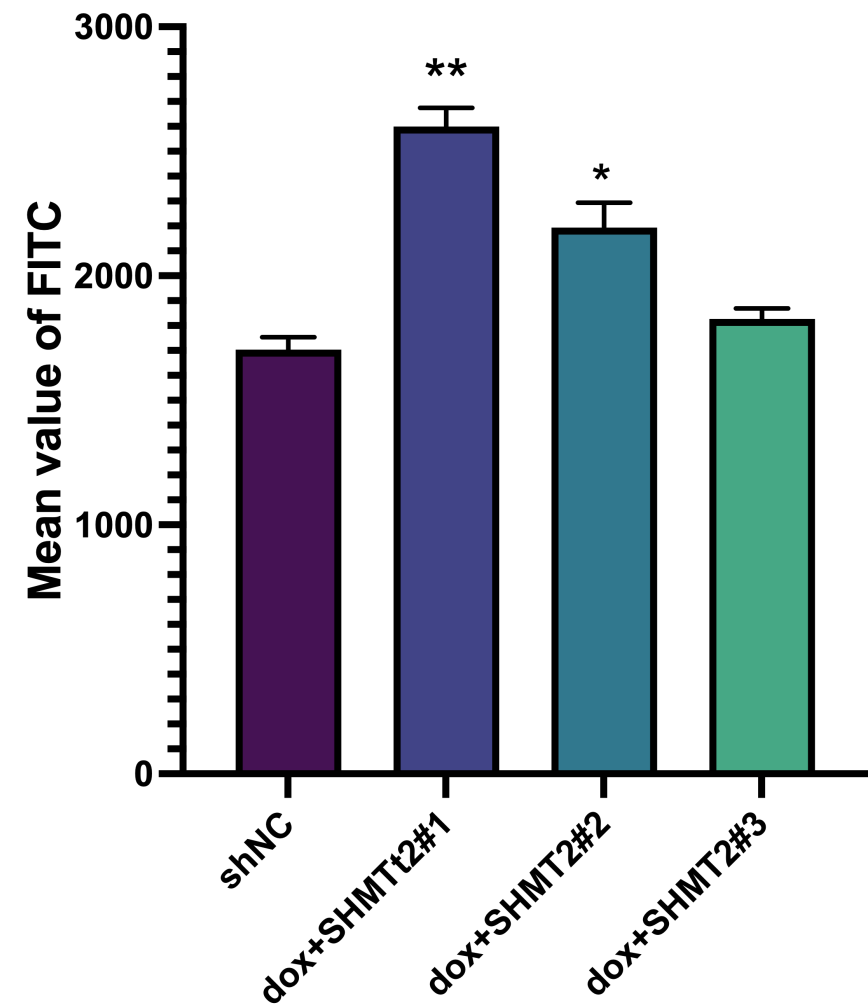

# Figure S5-2

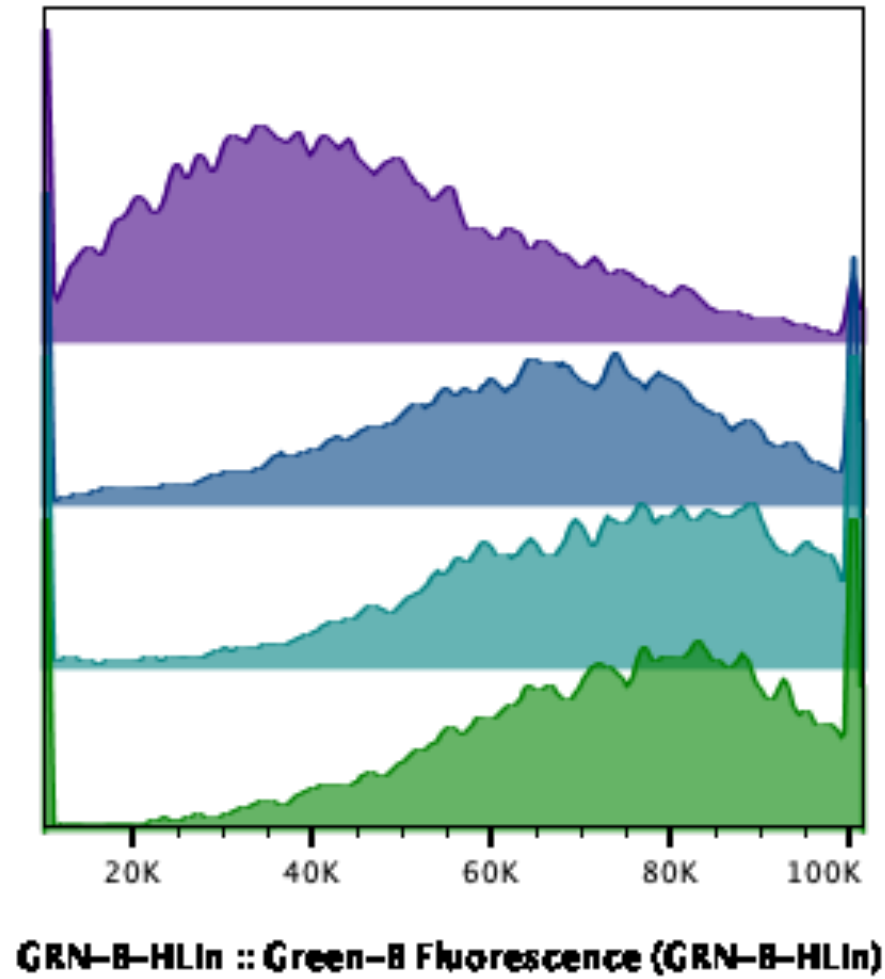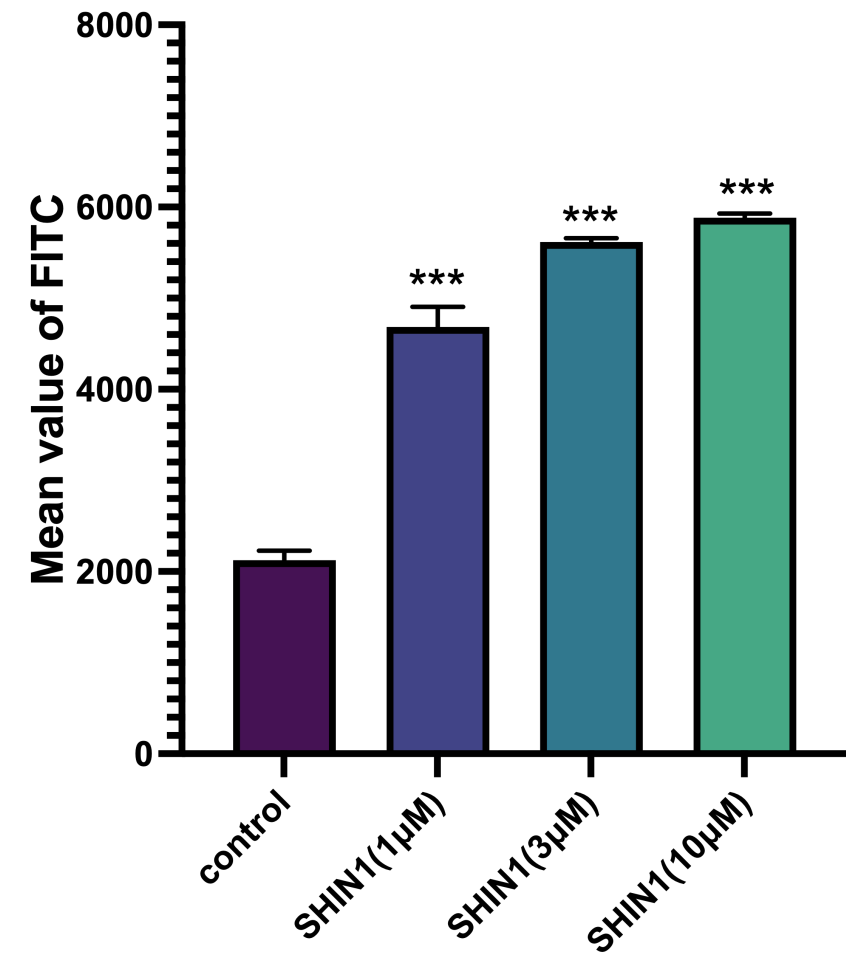

# Figure S6-1

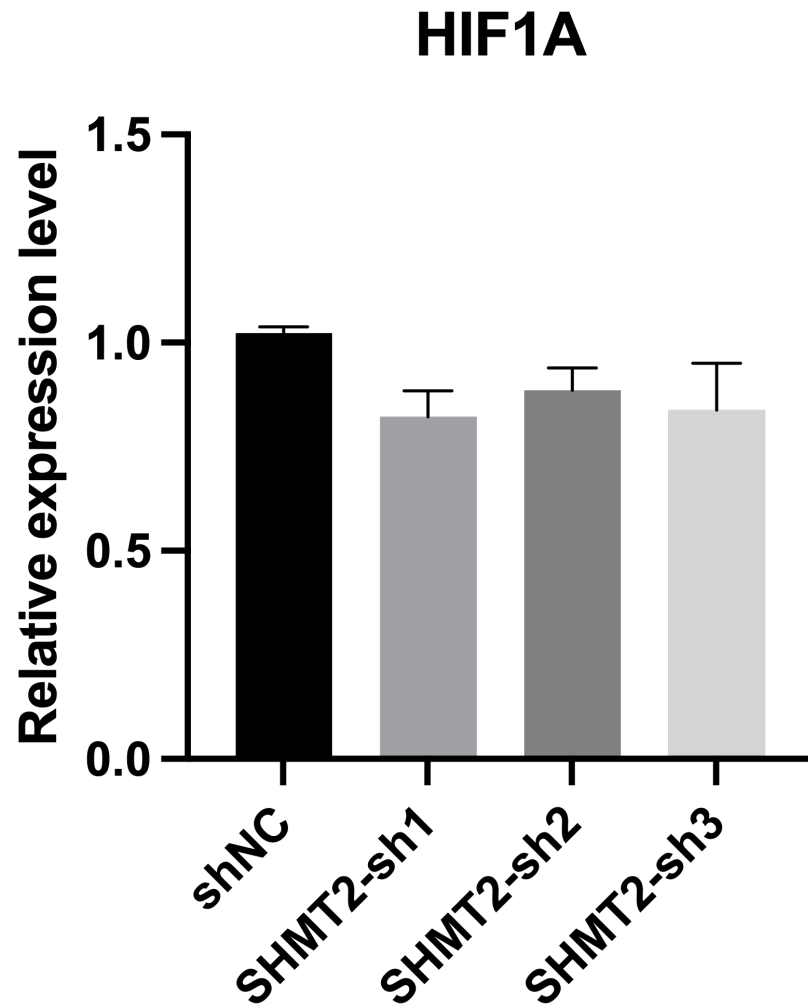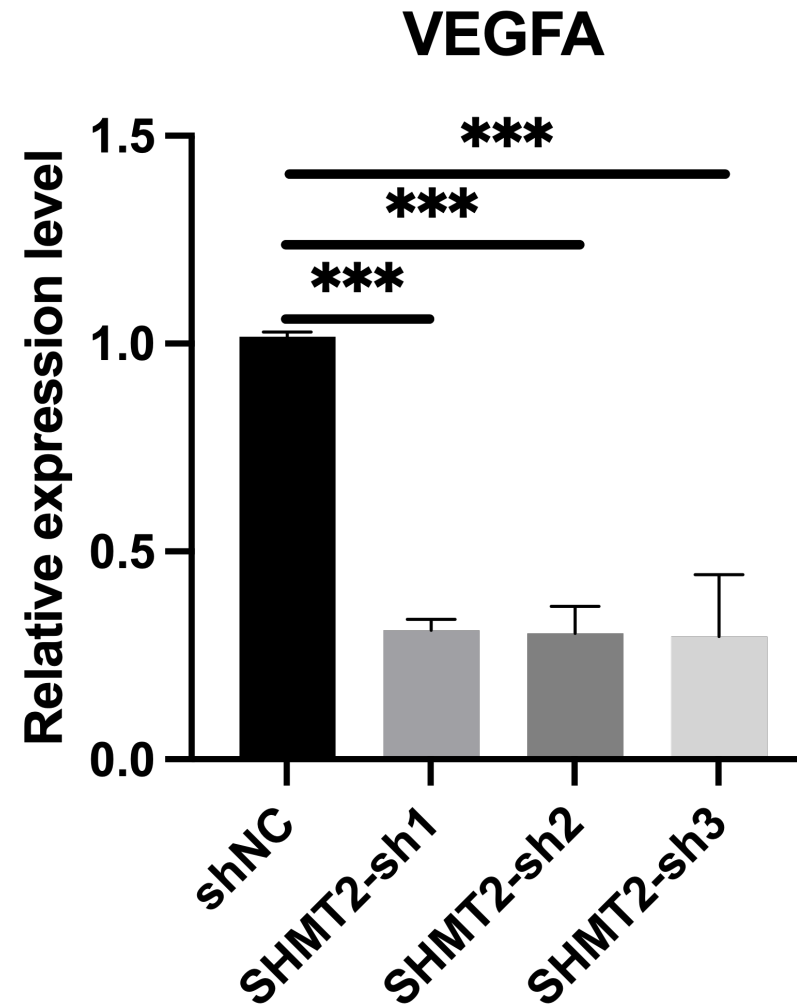



# Figure S7-1

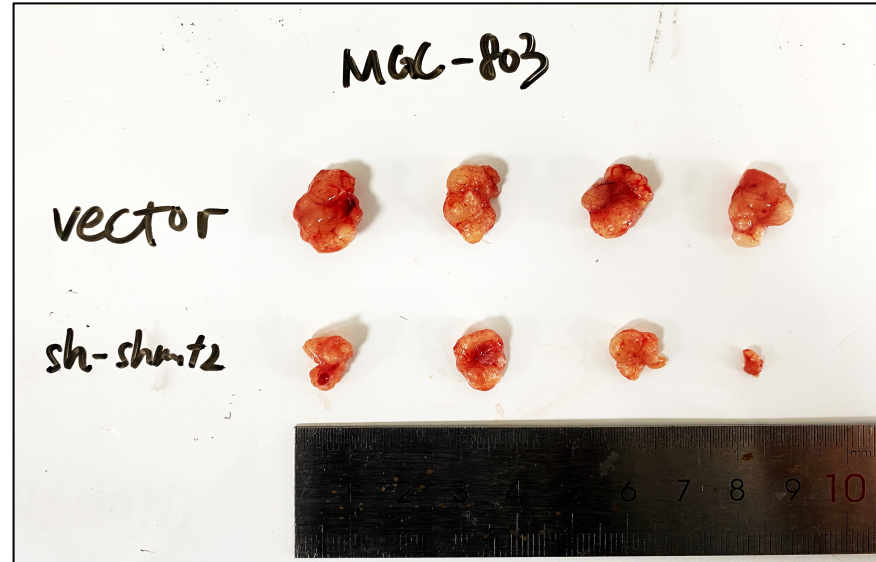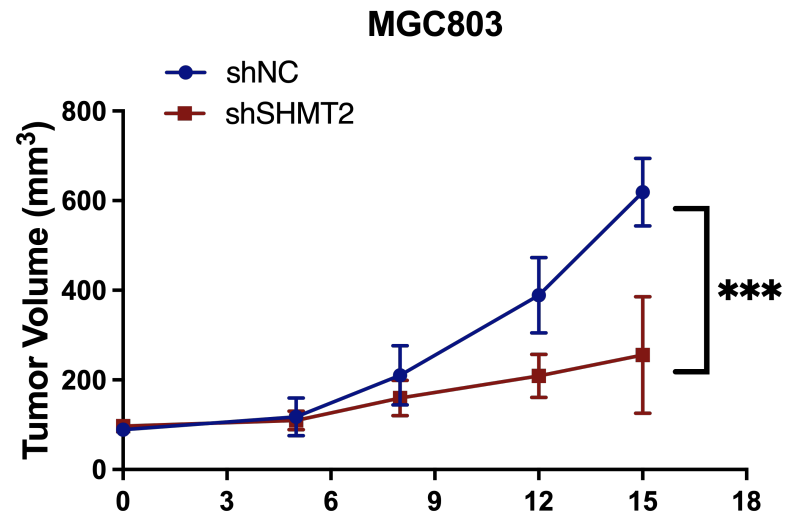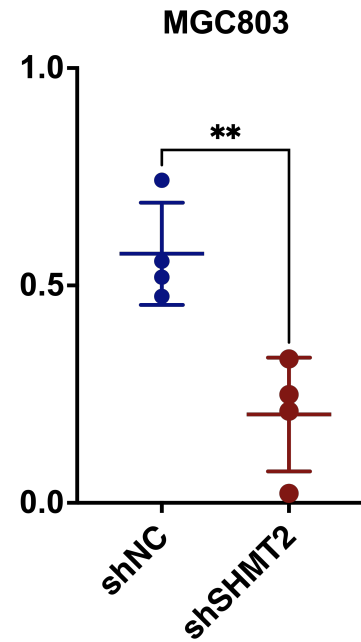

Supplement: s1 [file s1]
