# Supplementary material for: SHMT2 Promotes Gastric Cancer Development through Regulation of HIF1α/VEGF/STAT3 Signaling
Source: Int J Mol Sci. 2023 Apr 12;24(8):7150. doi: 10.3390/ijms24087150 (PMC10138966; doi:10.3390/ijms24087150)
Supplement: Supplementary file 1 [file ijms-24-07150-s001.zip › Table S1.xlsx]

## Sheet: 工作表 1 - markes_output
markes_output
	Spearman cor	p value	TCGA-BR-A4J4-01	TCGA-RD-A7C1-01	TCGA-BR-6852-01	TCGA-BR-7851-01	TCGA-BR-8487-01	TCGA-BR-6564-01	TCGA-D7-6526-01	TCGA-CD-8530-01	TCGA-FP-7735-01	TCGA-MX-A5UJ-01	TCGA-BR-4367-01	TCGA-D7-5578-01	TCGA-VQ-A8PX-01	TCGA-BR-8295-01	TCGA-D7-8579-01	TCGA-HU-A4G8-01	TCGA-3M-AB46-01	TCGA-D7-8572-01	TCGA-VQ-A923-01	TCGA-BR-6710-01	TCGA-BR-6802-01	TCGA-VQ-A91N-01	TCGA-D7-8573-01	TCGA-VQ-A91E-01	TCGA-HF-A5NB-01	TCGA-HU-A4GC-01	TCGA-VQ-A8PP-01	TCGA-MX-A5UG-01	TCGA-CG-5732-01	TCGA-CG-5719-01	TCGA-CD-8532-01	TCGA-HU-A4GT-01	TCGA-BR-4280-01	TCGA-VQ-A8PE-01	TCGA-CG-4469-01	TCGA-D7-6815-01	TCGA-F1-6874-01	TCGA-HU-8244-01	TCGA-BR-4366-01	TCGA-D7-6519-01	TCGA-F1-A72C-01	TCGA-BR-8690-01	TCGA-CD-5803-01	TCGA-CD-8528-01	TCGA-BR-8365-01	TCGA-RD-A7BS-01	TCGA-VQ-A8PB-01
DNA_repair	0.65	7.07e-46	0.703249	0.692893	0.704821	0.701243	0.708232	0.692165	0.705562	0.686955	0.698111	0.704863	0.698423	0.705736	0.693543	0.706289	0.676261	0.709197	0.703663	0.69434	0.697502	0.680158	0.706719	0.692447	0.710103	0.69663	0.700856	0.696647	0.693493	0.671968	0.70259	0.700707	0.689468	0.714117	0.708315	0.703436	0.699988	0.698719	0.68307	0.698519	0.688774	0.703575	0.698525	0.683363	0.700313	0.699089	0.678349	0.674036	0.71076
G2M_checkpoint	0.63	1.9e-42	0.689891	0.709246	0.703107	0.723223	0.702201	0.627869	0.718368	0.671469	0.685907	0.7035	0.699117	0.702076	0.701032	0.72875	0.645672	0.733819	0.717186	0.70929	0.708766	0.605651	0.711517	0.718318	0.729395	0.720864	0.713235	0.69626	0.711517	0.653279	0.670009	0.668561	0.677398	0.721684	0.715796	0.721877	0.718554	0.701072	0.704445	0.711842	0.701772	0.699514	0.700198	0.686141	0.676858	0.723835	0.641738	0.661156	0.741092
DNA_replication	0.61	6.04e-40	0.684002	0.702419	0.671307	0.677687	0.693282	0.625388	0.697365	0.646533	0.677266	0.677221	0.684501	0.690261	0.67352	0.705397	0.617144	0.705977	0.715552	0.674688	0.702185	0.608836	0.689916	0.694197	0.713896	0.694175	0.664898	0.686775	0.673809	0.626385	0.658843	0.659303	0.673409	0.703542	0.692509	0.703403	0.691433	0.68617	0.666477	0.69848	0.662057	0.671605	0.696862	0.676495	0.664901	0.71106	0.635273	0.635132	0.716613
Pyrimidine_metabolism	0.59	5.18e-36	0.632242	0.616461	0.62576	0.630921	0.62706	0.617997	0.630151	0.615314	0.626206	0.640846	0.633089	0.632609	0.626171	0.634666	0.606317	0.640086	0.62079	0.613487	0.618164	0.614651	0.643492	0.63709	0.631427	0.631117	0.637526	0.636537	0.61576	0.597266	0.627818	0.62586	0.615111	0.643426	0.630019	0.630561	0.637064	0.632586	0.607515	0.633108	0.621081	0.629039	0.628516	0.603357	0.626103	0.651559	0.608631	0.615937	0.631173
One_carbon_pool_by_folate	0.57	5.3e-34	0.538946	0.487725	0.536231	0.547477	0.554565	0.509701	0.584882	0.507641	0.539221	0.56771	0.535352	0.555144	0.55046	0.584239	0.511513	0.605326	0.529318	0.537915	0.518308	0.536894	0.557096	0.533598	0.542038	0.534943	0.594139	0.548159	0.53488	0.498812	0.569677	0.541705	0.525217	0.569776	0.544326	0.564796	0.515307	0.562179	0.50227	0.540828	0.55745	0.547108	0.515148	0.492012	0.524154	0.580583	0.506449	0.496375	0.578018
Tumor_proliferation_signature	0.56	6.56e-33	0.693457	0.786213	0.762244	0.788705	0.776814	0.576547	0.756757	0.711111	0.722697	0.738671	0.747374	0.75367	0.741427	0.793749	0.588655	0.795496	0.765718	0.752722	0.747691	0.519038	0.76291	0.768661	0.777814	0.770259	0.768051	0.733662	0.751571	0.604251	0.705238	0.708627	0.706798	0.786606	0.76183	0.771645	0.762172	0.733973	0.741066	0.777	0.767606	0.756988	0.765794	0.729748	0.711362	0.747465	0.583958	0.714328	0.801802
Glyoxylate_and_dicarboxylate_metabolism	0.49	5.36e-24	0.534252	0.574995	0.543481	0.554569	0.566198	0.544796	0.578902	0.522055	0.563438	0.538285	0.518826	0.587454	0.550325	0.612273	0.520635	0.56815	0.527199	0.531771	0.517068	0.536565	0.547416	0.558543	0.57038	0.573787	0.5728	0.543347	0.541752	0.500421	0.531419	0.539301	0.517825	0.586244	0.55909	0.545829	0.542246	0.551434	0.569979	0.565669	0.558712	0.521271	0.517234	0.501014	0.544074	0.56951	0.497525	0.51641	0.552885
Valine_leucine_and_isoleucine_biosynthesis	0.48	1.97e-23	0.583619	0.595314	0.571871	0.608145	0.574081	0.526526	0.566507	0.552855	0.564674	0.568829	0.518876	0.567786	0.552108	0.610704	0.545402	0.593253	0.539796	0.575442	0.552082	0.5492	0.572807	0.56099	0.568277	0.584964	0.587819	0.523141	0.57566	0.546554	0.536965	0.544537	0.538532	0.580424	0.582572	0.576241	0.575083	0.563228	0.564588	0.546277	0.564935	0.553769	0.562415	0.554015	0.54643	0.598063	0.529436	0.529222	0.593711
Cysteine_and_methionine_metabolism	0.41	9.42e-17	0.56711	0.544251	0.562971	0.551653	0.545875	0.531576	0.567125	0.54539	0.542409	0.54857	0.552356	0.554973	0.534303	0.587076	0.535263	0.552628	0.550571	0.584212	0.525518	0.570157	0.542996	0.542714	0.578567	0.540322	0.568103	0.536494	0.556848	0.515802	0.551691	0.53137	0.534181	0.566757	0.53753	0.580358	0.539522	0.564996	0.516615	0.531166	0.541445	0.555278	0.558614	0.540481	0.543148	0.556082	0.529967	0.507255	0.544632
Alanine_aspartate_and_glutamate_metabolism	0.4	3.22e-16	0.53169	0.419436	0.521456	0.536962	0.552047	0.520863	0.536469	0.485586	0.547001	0.547353	0.513431	0.541159	0.520358	0.464914	0.532557	0.538945	0.490643	0.524194	0.518454	0.532908	0.512193	0.527666	0.491335	0.537875	0.563797	0.542611	0.520322	0.509147	0.568056	0.525504	0.541276	0.551007	0.54532	0.534594	0.480196	0.562421	0.55692	0.524811	0.569363	0.512664	0.509613	0.48389	0.522205	0.551408	0.494506	0.483056	0.542815
D_Glutamine_and_D_glutamate_metabolism	0.4	7.14e-16	0.624098	0.487917	0.558918	0.580805	0.534012	0.526515	0.559813	0.532072	0.528959	0.543098	0.563028	0.503617	0.538713	0.527286	0.543694	0.572312	0.4948	0.544934	0.555138	0.571244	0.521059	0.559813	0.542037	0.577465	0.575517	0.532549	0.593802	0.539038	0.556902	0.563583	0.561915	0.578658	0.607528	0.622549	0.526953	0.574616	0.542017	0.515995	0.534329	0.57654	0.541086	0.446976	0.57748	0.602921	0.535331	0.496275	0.563217
Selenocompound_metabolism	0.4	1.22e-15	0.585884	0.533154	0.602874	0.608094	0.613447	0.592563	0.611465	0.599979	0.611846	0.609506	0.621791	0.593831	0.602113	0.632077	0.597566	0.61211	0.59229	0.610742	0.588086	0.614807	0.606602	0.599707	0.579829	0.605105	0.61939	0.605599	0.618622	0.595901	0.594285	0.599338	0.578882	0.60972	0.630135	0.604024	0.59435	0.6038	0.609026	0.588036	0.6043	0.591477	0.583333	0.593646	0.603962	0.642491	0.58922	0.515542	0.625592
D_Arginine_and_D_ornithine_metabolism	0.38	3.03e-14	0.427015	0.409228	0.471119	0.458013	0.504408	0.469267	0.465006	0.427314	0.515219	0.442063	0.449768	0.478205	0.458715	0.497678	0.430021	0.456006	0.450021	0.464274	0.43881	0.506934	0.473337	0.44408	0.436687	0.478655	0.487882	0.463705	0.448214	0.421326	0.506615	0.442287	0.446094	0.476475	0.505839	0.488508	0.432784	0.47661	0.463463	0.469496	0.511074	0.45594	0.42709	0.454429	0.46543	0.472005	0.431633	0.386811	0.473772
Amino_sugar_and_nucleotide_sugar_metabolism	0.34	2.18e-11	0.613569	0.648998	0.651559	0.63761	0.660386	0.633737	0.660877	0.617817	0.656109	0.624471	0.653676	0.64334	0.633385	0.635182	0.626842	0.635537	0.618898	0.638988	0.617251	0.669684	0.664191	0.636767	0.615243	0.630855	0.650493	0.640835	0.634957	0.614913	0.666208	0.66149	0.638829	0.658157	0.64888	0.646625	0.623941	0.650341	0.660487	0.632126	0.651467	0.641316	0.622401	0.611221	0.639238	0.669124	0.610181	0.620051	0.649273
Galactose_metabolism	0.34	1.77e-11	0.523093	0.559708	0.560073	0.539592	0.551554	0.557787	0.550127	0.517259	0.517515	0.560263	0.538741	0.577015	0.549806	0.553251	0.569051	0.545913	0.496592	0.571192	0.550229	0.556862	0.559425	0.546829	0.539788	0.556446	0.541897	0.544044	0.527809	0.536583	0.60236	0.542902	0.534795	0.563225	0.549863	0.595567	0.535	0.578804	0.570197	0.521974	0.575343	0.538625	0.526668	0.497713	0.539192	0.555682	0.516892	0.534084	0.556664
N_Glycan_biosynthesis	0.33	7.3e-11	0.678464	0.649001	0.690453	0.693678	0.671985	0.685545	0.702147	0.686336	0.703592	0.680199	0.701267	0.695172	0.691406	0.667382	0.690919	0.676582	0.66839	0.696463	0.682659	0.700612	0.693421	0.710185	0.681623	0.675558	0.682393	0.68403	0.67949	0.683653	0.711686	0.699277	0.696179	0.697945	0.689047	0.692493	0.671147	0.702278	0.699679	0.690107	0.700349	0.692711	0.697658	0.636776	0.690835	0.694981	0.684389	0.645956	0.6768
Fructose_and_mannose_metabolism	0.32	4.1e-10	0.625157	0.629337	0.650458	0.683035	0.646117	0.631635	0.662469	0.610022	0.64475	0.657585	0.642051	0.670836	0.667646	0.600388	0.64183	0.652731	0.589553	0.639993	0.630132	0.672686	0.660066	0.658119	0.648096	0.676335	0.676399	0.654433	0.634364	0.626789	0.688091	0.661289	0.644133	0.675853	0.662655	0.646269	0.64775	0.689894	0.680533	0.677714	0.638386	0.618081	0.628539	0.538595	0.637946	0.667343	0.590809	0.609594	0.656412
Glycosylphosphatidylinositol_GPI_anchor_biosynthesis	0.31	5.16e-10	0.612045	0.559429	0.566546	0.581246	0.581553	0.56456	0.600783	0.567536	0.59212	0.57573	0.601553	0.575155	0.588375	0.587118	0.575555	0.570432	0.578997	0.583577	0.585231	0.593515	0.57776	0.611306	0.59953	0.579895	0.580185	0.590615	0.586769	0.557785	0.598486	0.581577	0.586225	0.590546	0.608897	0.585872	0.575701	0.589953	0.570137	0.614434	0.604203	0.583484	0.581566	0.534724	0.562081	0.607231	0.564934	0.560794	0.601301
Cellular_response_to_hypoxia	0.29	5.87e-09	0.719092	0.684611	0.715578	0.72029	0.723431	0.711954	0.712624	0.709076	0.721852	0.712225	0.705243	0.708829	0.70549	0.714056	0.704635	0.721683	0.716134	0.710057	0.715846	0.697474	0.71942	0.703418	0.716912	0.716375	0.722108	0.714151	0.710846	0.694894	0.715907	0.707175	0.701639	0.716746	0.714865	0.72856	0.69704	0.711232	0.704015	0.705356	0.702407	0.710324	0.702091	0.709868	0.709449	0.709236	0.699923	0.692351	0.717018
Biotin_metabolism	0.27	1.46e-07	0.565379	0.517256	0.562951	0.578477	0.589416	0.560652	0.572737	0.517742	0.587218	0.602055	0.605926	0.570261	0.631536	0.603547	0.559837	0.581959	0.595029	0.567014	0.561001	0.640934	0.598289	0.647566	0.62042	0.622384	0.621792	0.563832	0.590379	0.557153	0.605844	0.581296	0.624033	0.602086	0.601107	0.544333	0.610539	0.613128	0.594993	0.636044	0.62362	0.599142	0.546773	0.521775	0.568494	0.603791	0.530777	0.524361	0.632445
Citrate_cycle	0.27	1.45e-07	0.685579	0.688858	0.68537	0.71277	0.660682	0.68639	0.699428	0.68037	0.691562	0.702273	0.668345	0.720565	0.717729	0.707061	0.683629	0.716503	0.681364	0.707189	0.641077	0.720901	0.677125	0.737158	0.702533	0.700705	0.710981	0.680886	0.675898	0.671626	0.724792	0.687107	0.691302	0.725849	0.735265	0.715845	0.691735	0.724307	0.722235	0.715591	0.74042	0.676516	0.682416	0.660063	0.688594	0.717432	0.68317	0.676969	0.700516
Lysine_degradation	0.27	1.81e-07	0.642631	0.61374	0.63462	0.656171	0.623145	0.650862	0.668876	0.642492	0.658024	0.656608	0.64773	0.657319	0.661465	0.675012	0.646614	0.649777	0.63197	0.67385	0.642023	0.656001	0.645173	0.667074	0.6658	0.654455	0.665369	0.641904	0.670632	0.64808	0.649869	0.639961	0.6369	0.655052	0.668696	0.663225	0.65836	0.664299	0.629409	0.673668	0.68205	0.664977	0.621811	0.624242	0.646836	0.677339	0.650107	0.607422	0.651166
Glycine_serine_and_threonine_metabolism	0.26	4.8e-07	0.417779	0.378672	0.409933	0.433072	0.439733	0.466705	0.451439	0.417224	0.508465	0.440135	0.432011	0.481051	0.419663	0.50732	0.454867	0.413762	0.372714	0.48689	0.418967	0.536433	0.460591	0.421111	0.428519	0.460879	0.457368	0.412538	0.387014	0.411882	0.503015	0.462189	0.445983	0.455466	0.428029	0.466806	0.356258	0.478284	0.435414	0.396853	0.500964	0.427272	0.448967	0.414656	0.480216	0.437432	0.428404	0.370234	0.445258
Pentose_phosphate_pathway	0.26	2.56e-07	0.601395	0.595442	0.616117	0.637759	0.644367	0.625628	0.696399	0.603823	0.636026	0.658372	0.621022	0.644187	0.635844	0.612055	0.588368	0.622517	0.638691	0.629264	0.597209	0.636972	0.610506	0.622097	0.63029	0.623997	0.625065	0.636796	0.592988	0.576424	0.666464	0.61905	0.625439	0.628029	0.615541	0.620159	0.604369	0.651014	0.639553	0.640587	0.562357	0.635187	0.608249	0.55473	0.632514	0.628714	0.571559	0.642159	0.649907
Ubiquinone_and_other_terpenoid_quinone_biosynthesis	0.25	1.46e-06	0.552677	0.543024	0.578738	0.562929	0.587187	0.542081	0.597968	0.553213	0.57798	0.56458	0.513137	0.576173	0.54037	0.601694	0.531452	0.556491	0.592784	0.543666	0.51941	0.586407	0.52456	0.553204	0.559591	0.552908	0.563848	0.58415	0.512072	0.511909	0.578756	0.581356	0.55986	0.60383	0.550163	0.532854	0.549543	0.545115	0.552235	0.556685	0.567713	0.584273	0.556565	0.564271	0.549632	0.588787	0.555033	0.514888	0.591637
Steroid_biosynthesis	0.24	1.84e-06	0.672804	0.605843	0.640855	0.649013	0.660883	0.604076	0.69133	0.594162	0.677797	0.651297	0.605226	0.670997	0.614173	0.70374	0.616081	0.604821	0.675851	0.682617	0.597955	0.636592	0.593161	0.638739	0.648566	0.665294	0.636534	0.645879	0.684729	0.590041	0.677481	0.660589	0.63187	0.675444	0.683167	0.700292	0.575235	0.715146	0.615995	0.658202	0.714104	0.642346	0.621669	0.64016	0.588764	0.665009	0.557483	0.656962	0.617009
Terpenoid_backbone_biosynthesis	0.24	2.51e-06	0.612571	0.656197	0.610338	0.653552	0.685451	0.574073	0.669143	0.605867	0.682442	0.658931	0.636131	0.634618	0.650705	0.707749	0.634134	0.658997	0.656331	0.641442	0.5648	0.650595	0.603318	0.686288	0.638498	0.686835	0.661106	0.700764	0.620161	0.597727	0.639854	0.652444	0.632309	0.680041	0.658639	0.655208	0.635801	0.661756	0.636075	0.674196	0.673438	0.633279	0.656902	0.597427	0.584107	0.677617	0.585133	0.623136	0.680751
Vitamin_B6_metabolism	0.24	3.81e-06	0.542931	0.454122	0.600929	0.62383	0.499844	0.495735	0.617236	0.485885	0.59218	0.616211	0.593375	0.577279	0.482064	0.494093	0.57042	0.520571	0.577648	0.516205	0.485888	0.520979	0.594812	0.51139	0.52628	0.527857	0.507119	0.537854	0.502355	0.524101	0.575834	0.549566	0.531723	0.570623	0.504379	0.608458	0.475038	0.579192	0.566658	0.476312	0.583556	0.549803	0.542978	0.483965	0.516417	0.58396	0.532026	0.526431	0.578973
Arginine_biosynthesis	0.22	1.69e-05	0.416083	0.398902	0.463518	0.519013	0.478259	0.490664	0.478826	0.417468	0.474698	0.49752	0.474877	0.54493	0.488435	0.416492	0.48713	0.469376	0.391139	0.432699	0.439386	0.426709	0.466609	0.507168	0.437031	0.508774	0.476779	0.490938	0.425708	0.493189	0.549826	0.457818	0.490621	0.544524	0.534933	0.504209	0.469003	0.550089	0.552424	0.532207	0.504349	0.422592	0.435491	0.385347	0.45081	0.524857	0.463042	0.387368	0.476639
Butanoate_metabolism	0.22	2.35e-05	0.526431	0.512956	0.495263	0.528855	0.531008	0.519938	0.519474	0.48144	0.564028	0.540385	0.524426	0.533253	0.526339	0.561151	0.537271	0.53891	0.495344	0.518857	0.49468	0.609463	0.515822	0.549903	0.538666	0.558974	0.564762	0.547978	0.500459	0.520017	0.556536	0.5515	0.542993	0.565681	0.54185	0.49698	0.543202	0.552727	0.508705	0.555173	0.56272	0.508525	0.517731	0.472371	0.505253	0.546431	0.517449	0.48888	0.551954
Genes_up-regulated_by_reactive_oxigen_species_(ROS)	0.21	5.94e-05	0.707379	0.711751	0.724558	0.715753	0.709438	0.714659	0.717159	0.718421	0.734304	0.721531	0.716288	0.727058	0.710767	0.698502	0.707258	0.715432	0.683384	0.698076	0.707593	0.727338	0.730159	0.706188	0.701809	0.71623	0.711438	0.71089	0.711059	0.708532	0.732236	0.725777	0.71481	0.710137	0.705158	0.718553	0.706623	0.704819	0.704183	0.705368	0.69312	0.726776	0.711501	0.682056	0.729226	0.716303	0.700929	0.698346	0.704736
P53_pathway	0.21	5.92e-05	0.703248	0.620994	0.687779	0.683767	0.667884	0.673799	0.673323	0.663084	0.678242	0.677221	0.670976	0.687243	0.668193	0.63587	0.67515	0.678172	0.657057	0.665887	0.667427	0.670481	0.698831	0.662972	0.664286	0.671735	0.675442	0.663069	0.683699	0.686355	0.681225	0.694283	0.682843	0.677942	0.670317	0.666781	0.657454	0.670943	0.678297	0.6684	0.668715	0.692769	0.675092	0.65755	0.690302	0.679688	0.671411	0.687592	0.672572
Valine_leucine_and_isoleucine_degradation	0.21	3.5e-05	0.640292	0.622492	0.641291	0.68181	0.670088	0.649031	0.649482	0.635874	0.669583	0.677234	0.663243	0.666547	0.666876	0.693157	0.672321	0.668817	0.634766	0.661367	0.616172	0.711417	0.649742	0.669554	0.63894	0.680397	0.6829	0.665402	0.651558	0.652293	0.683594	0.659521	0.649048	0.687071	0.67895	0.654236	0.654901	0.688125	0.674703	0.672639	0.687675	0.641913	0.63049	0.610681	0.644382	0.671848	0.653745	0.626037	0.69155
Folate_biosynthesis	0.2	8e-05	0.459314	0.477458	0.664773	0.664455	0.688211	0.512884	0.684283	0.460321	0.680499	0.680582	0.572575	0.64725	0.516661	0.555557	0.598507	0.57029	0.701697	0.54368	0.489105	0.519227	0.624299	0.592275	0.543054	0.558317	0.605458	0.565568	0.488965	0.556633	0.643579	0.560995	0.524928	0.649371	0.567231	0.64144	0.552899	0.600785	0.568767	0.562701	0.663685	0.594738	0.578493	0.535839	0.489903	0.627601	0.49785	0.583061	0.651446
Pyruvate_metabolism	0.19	0.00031	0.591887	0.601339	0.594341	0.603112	0.587154	0.587517	0.624443	0.575538	0.596103	0.599764	0.585416	0.61214	0.603746	0.625202	0.588098	0.601789	0.591623	0.587738	0.55067	0.637385	0.572518	0.624765	0.601264	0.609305	0.611556	0.60328	0.570831	0.574037	0.631159	0.580324	0.58443	0.629189	0.607241	0.60303	0.58556	0.629031	0.607982	0.620781	0.619093	0.57535	0.583211	0.579562	0.563196	0.607732	0.569675	0.569151	0.608424
Riboflavin_metabolism	0.18	0.000418	0.525202	0.565798	0.534012	0.575046	0.538266	0.487508	0.503361	0.549076	0.535564	0.568857	0.537007	0.533053	0.550146	0.512011	0.528208	0.522871	0.516518	0.540023	0.547693	0.548079	0.538564	0.52417	0.551724	0.547908	0.5379	0.556722	0.511397	0.543224	0.520336	0.516458	0.543604	0.548388	0.557518	0.519931	0.544867	0.548573	0.524667	0.589765	0.551131	0.518186	0.556456	0.479622	0.52623	0.562574	0.518237	0.521318	0.515811
Arginine_and_proline_metabolism	0.17	0.001	0.585078	0.558696	0.598067	0.621058	0.604127	0.60128	0.605865	0.568876	0.621199	0.616628	0.585086	0.633409	0.597669	0.600419	0.614696	0.565399	0.552577	0.592653	0.569898	0.587664	0.602703	0.604982	0.587067	0.609125	0.594128	0.60382	0.548671	0.608729	0.639436	0.597988	0.615079	0.633348	0.638286	0.624987	0.581294	0.651304	0.620768	0.618162	0.6205	0.595309	0.611973	0.562307	0.604897	0.595511	0.609533	0.563014	0.597784
Fatty_acid_biosynthesis	0.17	0.001	0.485472	0.462566	0.495805	0.516917	0.535183	0.505362	0.538985	0.493836	0.55023	0.525207	0.497579	0.489193	0.512133	0.46872	0.502817	0.499903	0.512413	0.480035	0.493062	0.521597	0.502818	0.512074	0.497916	0.521682	0.523166	0.50844	0.520298	0.520345	0.512909	0.476619	0.504641	0.558562	0.581233	0.484078	0.526423	0.551989	0.511891	0.532354	0.525086	0.507128	0.484153	0.479223	0.51679	0.518784	0.48805	0.455673	0.518278
Mannose_type_O_glycan_biosynthesis	0.17	0.001	0.484165	0.430772	0.497157	0.508844	0.489546	0.566102	0.498725	0.540996	0.531953	0.520715	0.544268	0.512912	0.554537	0.493566	0.509136	0.505802	0.465645	0.482268	0.51446	0.589427	0.556153	0.562889	0.465374	0.552154	0.519053	0.502829	0.536028	0.50199	0.543972	0.518854	0.509686	0.502477	0.499551	0.525088	0.460405	0.484546	0.511554	0.493049	0.506715	0.538918	0.489685	0.425528	0.538121	0.497486	0.548092	0.431178	0.508602
Ferroptosis	0.14	0.008	0.61572	0.581028	0.605261	0.616844	0.602036	0.602355	0.614731	0.602514	0.604217	0.60676	0.610613	0.61158	0.601987	0.588689	0.613036	0.596431	0.587706	0.61861	0.587391	0.626199	0.624126	0.598594	0.580116	0.60605	0.599001	0.596818	0.610285	0.617314	0.628431	0.604586	0.611852	0.606216	0.604527	0.617405	0.594223	0.612126	0.623361	0.577664	0.608804	0.609233	0.61376	0.593324	0.610897	0.611853	0.610307	0.615173	0.602489
Pantothenate_and_CoA_biosynthesis	0.13	0.011	0.482695	0.501753	0.520887	0.532024	0.544491	0.493344	0.499166	0.494066	0.523335	0.542228	0.534345	0.536209	0.506382	0.471155	0.539551	0.511163	0.496704	0.507185	0.514477	0.517755	0.549557	0.538062	0.470787	0.498059	0.533814	0.550326	0.491268	0.532692	0.546548	0.510664	0.548592	0.516524	0.542501	0.500418	0.525188	0.553221	0.536351	0.501832	0.568519	0.488104	0.498367	0.473405	0.524468	0.520492	0.493499	0.52294	0.535356
Purine_metabolism	0.13	0.012	0.534267	0.503846	0.546687	0.559594	0.527434	0.569729	0.558136	0.555344	0.559738	0.569222	0.565441	0.566656	0.540245	0.540731	0.556757	0.547876	0.541377	0.564621	0.533148	0.560216	0.552785	0.551116	0.523985	0.548917	0.546908	0.550475	0.543992	0.554814	0.561931	0.56586	0.546258	0.564618	0.557492	0.553751	0.537666	0.56066	0.52862	0.538621	0.553196	0.545811	0.553443	0.51528	0.560852	0.561037	0.562429	0.533537	0.554787
Sphingolipid_metabolism	0.13	0.015	0.630251	0.589501	0.628157	0.634192	0.610202	0.624914	0.630737	0.601359	0.637247	0.640508	0.629157	0.647355	0.615936	0.562351	0.653002	0.61223	0.597191	0.638308	0.624546	0.645856	0.621932	0.632654	0.611357	0.622321	0.652272	0.653974	0.59061	0.629181	0.653126	0.638582	0.647813	0.655872	0.63247	0.63262	0.610206	0.644015	0.647412	0.648683	0.644461	0.637325	0.637533	0.56216	0.615157	0.634742	0.604452	0.606814	0.610279
Thiamine_metabolism	0.13	0.011	0.384227	0.255587	0.544679	0.533677	0.511173	0.448971	0.5678	0.332119	0.571365	0.525082	0.47674	0.513371	0.396254	0.460356	0.502153	0.445944	0.569816	0.465711	0.427764	0.471456	0.506621	0.461458	0.459983	0.440114	0.501458	0.497956	0.406778	0.447721	0.58539	0.511393	0.471048	0.52368	0.46144	0.495662	0.438002	0.498869	0.463493	0.456413	0.582309	0.459384	0.456826	0.388256	0.425196	0.532337	0.436323	0.44559	0.513222
Nitrogen_metabolism	0.12	0.021	0.382051	0.292223	0.356823	0.386385	0.398469	0.363336	0.411885	0.375763	0.394557	0.443198	0.393999	0.436044	0.460871	0.298909	0.415375	0.384136	0.408687	0.392653	0.371101	0.4209	0.360664	0.465843	0.302555	0.453801	0.382961	0.472546	0.372552	0.362307	0.510591	0.364213	0.388998	0.480809	0.423142	0.447741	0.352145	0.476099	0.489695	0.407735	0.485074	0.35786	0.398835	0.307938	0.364325	0.430337	0.352323	0.362973	0.380864
Other_glycan_degradation	0.12	0.016	0.604769	0.583629	0.608073	0.590213	0.577048	0.610588	0.629099	0.579101	0.626763	0.613742	0.609342	0.613137	0.598349	0.56544	0.628458	0.597001	0.599666	0.608355	0.602471	0.616018	0.592943	0.586202	0.6108	0.601712	0.621176	0.623151	0.594294	0.622723	0.625922	0.622617	0.59774	0.620828	0.616343	0.612225	0.601338	0.625144	0.621359	0.656017	0.622994	0.645329	0.597556	0.585263	0.604877	0.632818	0.583193	0.598522	0.581311
Other_types_of_O_glycan_biosynthesis	0.12	0.016	0.604769	0.583629	0.608073	0.590213	0.577048	0.610588	0.629099	0.579101	0.626763	0.613742	0.609342	0.613137	0.598349	0.56544	0.628458	0.597001	0.599666	0.608355	0.602471	0.616018	0.592943	0.586202	0.6108	0.601712	0.621176	0.623151	0.594294	0.622723	0.625922	0.622617	0.59774	0.620828	0.616343	0.612225	0.601338	0.625144	0.621359	0.656017	0.622994	0.645329	0.597556	0.585263	0.604877	0.632818	0.583193	0.598522	0.581311
Lipoic_acid_metabolism	0.11	0.034	0.526287	0.424128	0.495579	0.381829	0.456516	0.429257	0.395089	0.359113	0.512689	0.463168	0.434051	0.409956	0.45952	0.486437	0.451624	0.470072	0.406581	0.37237	0.478545	0.535707	0.398898	0.496884	0.396951	0.471755	0.50875	0.496664	0.370599	0.397277	0.491328	0.473162	0.531047	0.502773	0.498613	0.304546	0.502797	0.464912	0.42348	0.46846	0.514828	0.43059	0.481439	0.304246	0.417979	0.430909	0.399696	0.396894	0.456143
beta_Alanine_metabolism	0.09	0.073	0.52669	0.46341	0.532289	0.538027	0.554007	0.549605	0.531217	0.495033	0.583745	0.559217	0.527734	0.552791	0.514243	0.558899	0.551103	0.524916	0.476875	0.524836	0.528261	0.571613	0.558706	0.533392	0.518544	0.530033	0.58387	0.546865	0.532162	0.555411	0.536326	0.535761	0.549333	0.541941	0.552252	0.494349	0.523114	0.563064	0.517491	0.514544	0.573035	0.523435	0.519647	0.510633	0.542873	0.52012	0.537724	0.503166	0.544056
IL-10_Anti-inflammatory_Signaling_Pathway	0.08	0.126	0.665096	0.661342	0.675387	0.647644	0.607328	0.625963	0.64662	0.666493	0.616823	0.612296	0.698429	0.680829	0.597832	0.48885	0.666613	0.604241	0.616451	0.656301	0.644682	0.604089	0.675365	0.565793	0.585179	0.591681	0.599816	0.586468	0.644161	0.687513	0.671771	0.662494	0.663585	0.615881	0.638832	0.659665	0.676131	0.597061	0.690653	0.551824	0.598583	0.602916	0.639176	0.555069	0.669279	0.620067	0.635287	0.661998	0.645675
Phenylalanine_tyrosine_and_tryptophan_biosynthesis	0.08	0.116	0.347376	0.39189	0.403211	0.352797	0.345867	0.304084	0.395606	0.280806	0.470517	0.332988	0.237509	0.349208	0.327236	0.345368	0.315672	0.297925	0.332486	0.368669	0.300287	0.306001	0.168915	0.308643	0.341284	0.333531	0.322401	0.38189	0.343311	0.341725	0.42643	0.388625	0.374534	0.27541	0.338696	0.429949	0.307873	0.290043	0.355076	0.31595	0.372792	0.32466	0.346522	0.355795	0.380328	0.364811	0.330045	0.316842	0.308096
Sulfur_metabolism	0.08	0.107	0.452981	0.214022	0.442648	0.483405	0.414984	0.401377	0.426675	0.330477	0.471996	0.456339	0.411281	0.502271	0.346404	0.438853	0.477514	0.405016	0.418815	0.393873	0.402128	0.401449	0.415934	0.37422	0.368264	0.409898	0.473526	0.51456	0.355379	0.438202	0.448812	0.483061	0.431248	0.460457	0.403785	0.469205	0.451482	0.471307	0.436142	0.421126	0.416216	0.481348	0.405753	0.4185	0.38532	0.435535	0.370524	0.381831	0.452844
Biosynthesis_of_unsaturated_fatty_acids	0.07	0.166	0.614193	0.56674	0.635793	0.622671	0.596095	0.638643	0.621268	0.609578	0.630574	0.627256	0.654626	0.629058	0.550648	0.683058	0.6461	0.634996	0.621539	0.664843	0.596083	0.635595	0.621487	0.61237	0.607187	0.634195	0.590446	0.614776	0.633165	0.60923	0.653306	0.681825	0.667959	0.628173	0.638729	0.645391	0.617477	0.655941	0.607508	0.542058	0.625939	0.608978	0.638262	0.57679	0.636892	0.635978	0.623202	0.598075	0.624677
Synthesis_and_degradation_of_ketone_bodies	0.07	0.175	0.588122	0.709997	0.558794	0.61427	0.71545	0.655083	0.701515	0.696812	0.704657	0.690464	0.68761	0.689284	0.712354	0.701811	0.701208	0.647001	0.62649	0.650308	0.47717	0.757622	0.656537	0.745499	0.612077	0.690074	0.737218	0.702447	0.542405	0.677429	0.690389	0.672378	0.641496	0.756641	0.637705	0.644952	0.715639	0.694914	0.721725	0.738319	0.690636	0.630649	0.598529	0.593843	0.620838	0.75918	0.682493	0.637192	0.699113
Tumor_Inflammation_Signature	0.07	0.16	0.680134	0.742701	0.792945	0.684591	0.667722	0.686715	0.550128	0.628787	0.68248	0.648731	0.732409	0.694137	0.646137	0.43658	0.619732	0.714619	0.542384	0.685242	0.752016	0.629644	0.755647	0.63207	0.627072	0.68213	0.657731	0.649381	0.694313	0.709402	0.691256	0.649318	0.732153	0.624736	0.703833	0.67151	0.628143	0.625978	0.696331	0.497896	0.57433	0.628358	0.679264	0.723721	0.769635	0.614529	0.675404	0.650823	0.65517
Fatty_acid_elongation	0.067	0.09	0.618636	0.604456	0.652651	0.646213	0.630703	0.638241	0.619965	0.615757	0.636917	0.648751	0.672496	0.645105	0.594282	0.675821	0.649654	0.636322	0.625479	0.662958	0.594228	0.643637	0.619741	0.617885	0.552374	0.63341	0.652027	0.631231	0.631994	0.640102	0.662371	0.662954	0.649017	0.649271	0.644833	0.641317	0.639728	0.637454	0.598618	0.601531	0.638553	0.643602	0.657758	0.603547	0.653189	0.667761	0.650932	0.602721	0.634318
Glycosaminoglycan_degradation	0.05	0.301	0.525542	0.49954	0.558153	0.537517	0.542531	0.554127	0.559614	0.558786	0.58613	0.57154	0.574745	0.558113	0.484533	0.4943	0.553836	0.534848	0.459859	0.565927	0.531586	0.571289	0.571664	0.526799	0.523354	0.540037	0.565869	0.520204	0.511768	0.557729	0.571247	0.588818	0.578781	0.516965	0.522435	0.529651	0.525786	0.556782	0.573164	0.530554	0.54646	0.524631	0.55466	0.478945	0.554713	0.562259	0.558924	0.540545	0.560622
Propanoate_metabolism	0.05	0.373	0.606709	0.573825	0.605808	0.614402	0.61076	0.606884	0.638858	0.593482	0.62275	0.61325	0.625476	0.615211	0.632337	0.649825	0.618867	0.619391	0.614166	0.603175	0.580624	0.671441	0.593838	0.621197	0.61661	0.634072	0.625812	0.612778	0.614247	0.595479	0.639027	0.600449	0.607888	0.626605	0.626468	0.601676	0.602655	0.649609	0.605519	0.64382	0.647614	0.592298	0.594259	0.553811	0.587604	0.606488	0.605613	0.578394	0.623674
PI3K_AKT_mTOR_pathway	0.04	0.497	0.655771	0.638964	0.65862	0.667941	0.64111	0.671332	0.652422	0.655676	0.650836	0.65473	0.659372	0.662851	0.653598	0.617064	0.666063	0.656758	0.647401	0.657226	0.657501	0.660174	0.661179	0.657351	0.635637	0.659593	0.652263	0.652923	0.667823	0.667932	0.652785	0.656668	0.653104	0.646951	0.65837	0.66122	0.643775	0.647245	0.648753	0.622223	0.65505	0.666584	0.663228	0.646363	0.67989	0.649007	0.665834	0.638976	0.651104
Oxidative_phosphorylation	0.03	0.552	0.687017	0.688729	0.687707	0.671812	0.695179	0.679087	0.696495	0.684514	0.690498	0.686227	0.672216	0.698659	0.688356	0.702651	0.672017	0.698985	0.705776	0.65948	0.671419	0.696698	0.695656	0.687866	0.675677	0.680225	0.704524	0.701418	0.674734	0.660223	0.701882	0.698172	0.679891	0.707623	0.691274	0.676334	0.681965	0.677847	0.67418	0.691698	0.68868	0.705084	0.698785	0.685915	0.68171	0.667871	0.686623	0.698984	0.693088
Glycosaminoglycan_biosynthesis_keratan_sulfate	0.02	0.755	0.598328	0.528697	0.59749	0.62498	0.561864	0.606282	0.612908	0.618519	0.619011	0.582724	0.609599	0.638864	0.615474	0.594272	0.652138	0.573369	0.573025	0.643505	0.597847	0.609041	0.658617	0.619678	0.617725	0.589992	0.611961	0.603946	0.596205	0.649023	0.662746	0.680433	0.668931	0.608571	0.565855	0.60168	0.588177	0.633746	0.618568	0.613062	0.616033	0.626195	0.607973	0.548208	0.633819	0.647938	0.585414	0.586467	0.561043
alpha_Linolenic_acid_metabolism	0.01	0.92	0.297048	0.303261	0.410883	0.340035	0.373188	0.417259	0.461029	0.328546	0.434044	0.449878	0.283736	0.440298	0.341837	0.267989	0.350638	0.334357	0.304437	0.30837	0.317528	0.36141	0.38161	0.407056	0.266396	0.395198	0.390346	0.346925	0.26602	0.406143	0.437767	0.356195	0.382116	0.442234	0.454296	0.343926	0.365698	0.420232	0.369134	0.348854	0.307042	0.277463	0.464888	0.324221	0.354116	0.388793	0.290201	0.318745	0.336985
Glycolysis_Gluconeogenesis	0.01	0.89	0.546433	0.540379	0.546805	0.567672	0.540881	0.55793	0.563683	0.515035	0.551225	0.570782	0.538967	0.583073	0.563188	0.491372	0.564218	0.534254	0.52132	0.523746	0.54751	0.586949	0.545096	0.565347	0.546142	0.583209	0.569601	0.591722	0.49282	0.542073	0.616569	0.557582	0.566626	0.56169	0.530795	0.552354	0.551663	0.58696	0.54626	0.592443	0.559591	0.53393	0.541768	0.484335	0.550771	0.514526	0.541177	0.559104	0.538035
Glycosaminoglycan_biosynthesis_heparan_sulfate_heparin	0.01	0.898	0.400978	0.350838	0.412194	0.437431	0.383018	0.506949	0.451364	0.486392	0.451671	0.439626	0.415428	0.483995	0.439261	0.343889	0.440073	0.41678	0.367652	0.427427	0.41975	0.512252	0.481389	0.487503	0.385489	0.416744	0.395716	0.395516	0.45	0.476692	0.463858	0.474618	0.418998	0.409326	0.42661	0.410375	0.391389	0.441016	0.395893	0.364539	0.437587	0.494263	0.410315	0.339	0.476402	0.479735	0.488278	0.392157	0.435799
Inflammatory_response	0.01	0.832	0.589785	0.575774	0.614696	0.600595	0.555524	0.59074	0.57182	0.591163	0.58616	0.592334	0.644757	0.618188	0.5608	0.432558	0.621454	0.584304	0.53892	0.625046	0.61139	0.567305	0.629463	0.541623	0.536182	0.568118	0.548799	0.551156	0.597584	0.643014	0.616203	0.619025	0.611836	0.569055	0.587042	0.600993	0.597077	0.574095	0.639633	0.467598	0.576739	0.563206	0.594037	0.566375	0.638497	0.566459	0.597184	0.599434	0.59513
Apoptosis	-0.02	0.725	0.701185	0.681029	0.702617	0.695176	0.682146	0.691211	0.690583	0.695308	0.686258	0.693252	0.713398	0.702546	0.671794	0.638129	0.70599	0.690775	0.671236	0.705774	0.703188	0.691818	0.713412	0.679846	0.666157	0.679582	0.688028	0.684898	0.705047	0.715295	0.702422	0.705306	0.70315	0.685403	0.694805	0.700547	0.691834	0.692581	0.712147	0.650623	0.685898	0.692238	0.702722	0.68365	0.716258	0.683842	0.705	0.696765	0.698882
Caffeine_metabolism	-0.02	0.646	0.244695	0.111041	0.146234	0.29584	0.333686	0.169973	0.287542	0.0303616	0.259897	0.311818	0.0976372	0.423143	0.327479	0.149631	0.321772	0.238421	0.363732	0.301834	0.112686	0.108547	0.219023	0.213489	0.0457535	0.219981	0.400711	0.325549	0.204819	0.300761	0.319348	0.200921	0.319179	0.338471	0.343244	0.182787	0.437256	0.429871	0.356056	0.433743	0.459308	0.0816249	0.293116	0.259175	0.084447	0.267879	0.123693	0.110426	0.228525
Glycerophospholipid_metabolism	-0.02	0.769	0.521963	0.50347	0.550071	0.543237	0.522035	0.559932	0.570536	0.523843	0.576768	0.568523	0.530048	0.566574	0.551908	0.486664	0.548494	0.519939	0.501601	0.525227	0.53356	0.556807	0.558943	0.559781	0.511879	0.551752	0.543627	0.555998	0.522826	0.559861	0.577724	0.559105	0.545698	0.561211	0.570247	0.539716	0.54824	0.567548	0.548123	0.534738	0.543845	0.535168	0.57781	0.487463	0.546122	0.553264	0.539126	0.509885	0.53195
Porphyrin_and_chlorophyll_metabolism	-0.03	0.587	0.474923	0.300668	0.255186	0.335569	0.319089	0.327037	0.440315	0.315268	0.374181	0.389176	0.374581	0.407698	0.351594	0.299586	0.413673	0.215612	0.360859	0.300265	0.425644	0.359731	0.269436	0.341606	0.376467	0.358705	0.337925	0.525016	0.236068	0.372007	0.500817	0.344751	0.419517	0.293313	0.305342	0.346473	0.378807	0.408895	0.397034	0.357133	0.414352	0.272149	0.308744	0.241314	0.265376	0.350479	0.29109	0.355254	0.337712
Ether_lipid_metabolism	-0.04	0.484	0.450835	0.478193	0.527474	0.491277	0.490655	0.518795	0.537901	0.487481	0.544658	0.549339	0.481983	0.545839	0.494608	0.430423	0.496726	0.477038	0.441323	0.47476	0.490549	0.508855	0.512263	0.534784	0.440385	0.51667	0.507878	0.506987	0.446636	0.536553	0.556803	0.493641	0.51916	0.540748	0.558024	0.48918	0.519037	0.530003	0.509738	0.492242	0.482456	0.453274	0.567475	0.463837	0.505117	0.503813	0.463685	0.484781	0.479759
Glycerolipid_metabolism	-0.04	0.445	0.490511	0.482548	0.510478	0.524566	0.50476	0.567758	0.540973	0.518747	0.545147	0.521741	0.51303	0.551894	0.542633	0.537615	0.549288	0.473151	0.48612	0.548062	0.505707	0.535424	0.516475	0.531637	0.52222	0.513536	0.506993	0.547585	0.522269	0.543064	0.575434	0.543118	0.532798	0.5355	0.546332	0.541539	0.528059	0.555939	0.534224	0.501739	0.579313	0.514341	0.533371	0.475419	0.5124	0.515234	0.526832	0.49763	0.511026
Collagen_formation	-0.05	0.342	0.572644	0.52277	0.561706	0.590994	0.508365	0.613328	0.566325	0.587277	0.596929	0.605767	0.604253	0.587462	0.49434	0.476985	0.601179	0.549069	0.563067	0.629636	0.553966	0.550871	0.589831	0.537015	0.50965	0.506829	0.540773	0.546595	0.600296	0.63027	0.539949	0.648986	0.557906	0.538285	0.529512	0.576313	0.525669	0.574613	0.582099	0.45624	0.554624	0.599047	0.577226	0.532778	0.620651	0.569722	0.606921	0.565009	0.572464
Glycosaminoglycan_biosynthesis_chondroitin_sulfate_dermatan_sulfate	-0.05	0.342	0.543412	0.471606	0.573201	0.578281	0.523978	0.638275	0.575687	0.618309	0.612008	0.592777	0.593263	0.599087	0.529882	0.564237	0.600049	0.560518	0.495283	0.622784	0.555525	0.619077	0.589631	0.57269	0.492798	0.549866	0.549158	0.531371	0.593062	0.62876	0.619401	0.620704	0.587869	0.551478	0.52882	0.588796	0.524441	0.569572	0.58212	0.422183	0.56274	0.596585	0.579076	0.517767	0.629759	0.576253	0.627247	0.517828	0.581006
Inositol_phosphate_metabolism	-0.05	0.347	0.640324	0.597844	0.637517	0.637252	0.628	0.633615	0.626228	0.635952	0.613349	0.650419	0.651147	0.636209	0.641782	0.59218	0.664108	0.629352	0.574513	0.618893	0.665268	0.652463	0.641953	0.631603	0.635423	0.648586	0.656515	0.636556	0.653049	0.665377	0.641518	0.629044	0.648863	0.622506	0.622354	0.625871	0.639178	0.636806	0.660677	0.632879	0.634773	0.617427	0.62546	0.563569	0.652934	0.619614	0.660786	0.608126	0.6448
Linoleic_acid_metabolism	-0.05	0.339	0.287916	0.23048	0.280672	0.291282	0.266732	0.326572	0.368218	0.217144	0.332919	0.363992	0.268768	0.384147	0.349708	0.112308	0.314086	0.284254	0.259238	0.133532	0.294092	0.348821	0.341602	0.354112	0.21172	0.361247	0.327714	0.357137	0.143434	0.318411	0.396964	0.283307	0.358015	0.367916	0.372676	0.269729	0.36539	0.375177	0.343713	0.314624	0.369675	0.210449	0.420235	0.213865	0.255628	0.263231	0.231729	0.248785	0.278106
Pentose_and_glucuronate_interconversions	-0.05	0.319	0.386576	0.113773	0.0635775	0.185672	0.162302	0.179415	0.334799	0.166216	0.229626	0.27415	0.269135	0.293991	0.21967	0.0884279	0.27316	0.00240318	0.256876	0.110883	0.340257	0.243442	0.0625987	0.199068	0.23411	0.211151	0.189033	0.48356	0.00256304	0.25755	0.430512	0.197945	0.330661	0.124756	0.139569	0.202666	0.267714	0.332694	0.303382	0.226882	0.300836	0.067334	0.15837	0.0654011	0.0764238	0.213715	0.118777	0.223625	0.190627
Phosphonate_and_phosphinate_metabolism	-0.06	0.285	0.544226	0.509929	0.558701	0.55595	0.539497	0.558126	0.560671	0.540263	0.565213	0.571888	0.554034	0.56229	0.552485	0.496033	0.559077	0.526423	0.518984	0.551232	0.546991	0.567714	0.564312	0.556498	0.525547	0.553581	0.554018	0.555544	0.550113	0.562383	0.568502	0.557352	0.558428	0.555486	0.555296	0.548942	0.554103	0.565598	0.549804	0.538157	0.562698	0.543144	0.555439	0.500909	0.560839	0.546062	0.555665	0.521574	0.550931
Starch_and_sucrose_metabolism	-0.06	0.215	0.358252	0.180907	0.172504	0.266038	0.222838	0.265815	0.301926	0.209096	0.247145	0.332744	0.294621	0.327985	0.259808	0.131983	0.333723	0.15277	0.277618	0.205294	0.328136	0.289559	0.185823	0.258478	0.22248	0.261883	0.262942	0.434833	0.154693	0.320285	0.409156	0.254559	0.32469	0.238954	0.218799	0.284754	0.276596	0.347181	0.311068	0.241592	0.32431	0.16038	0.23015	0.151629	0.188756	0.229367	0.219147	0.230425	0.243242
Ascorbate_and_aldarate_metabolism	-0.07	0.161	0.357795	0.0581601	-0.0324896	0.119322	0.0949328	0.100478	0.292179	0.0851757	0.165979	0.227295	0.219392	0.245199	0.170998	0.0111612	0.241228	-0.0811171	0.189628	0.0232347	0.295233	0.196948	-0.0215557	0.142458	0.162634	0.158494	0.14716	0.47344	-0.0532477	0.229113	0.396549	0.11983	0.283736	0.072215	0.0731154	0.145459	0.220743	0.293135	0.249364	0.190739	0.25611	-0.0140366	0.08421	-0.0201079	-0.0101211	0.155622	0.0687014	0.15078	0.130635
Drug_metabolism_other_enzymes	-0.07	0.18	0.415067	0.248481	0.214516	0.296739	0.286217	0.306363	0.396312	0.25058	0.313622	0.370622	0.325306	0.394127	0.320472	0.222001	0.365094	0.194524	0.333696	0.245246	0.356569	0.297683	0.230657	0.315409	0.264853	0.301663	0.307462	0.469437	0.173826	0.347738	0.445982	0.296515	0.391603	0.27799	0.264101	0.294025	0.379972	0.419712	0.366909	0.325467	0.398907	0.212439	0.2734	0.226872	0.2191	0.30632	0.249966	0.306888	0.273417
Glutathione_metabolism	-0.07	0.175	0.597923	0.607423	0.591994	0.611159	0.586025	0.613056	0.647748	0.605654	0.661155	0.641394	0.598557	0.645227	0.612351	0.60476	0.637069	0.590115	0.597314	0.597245	0.593801	0.683482	0.614826	0.616905	0.583914	0.610802	0.604115	0.632611	0.581036	0.610511	0.668627	0.629102	0.624596	0.610037	0.613306	0.621899	0.624662	0.679155	0.60766	0.607715	0.643725	0.605708	0.64609	0.57758	0.627444	0.597168	0.613265	0.594993	0.574254
Glycosphingolipid_biosynthesis_lacto_and_neolacto_series	-0.07	0.191	0.514469	0.268339	0.438747	0.506609	0.476508	0.528459	0.493456	0.487029	0.523141	0.482051	0.496704	0.523223	0.54288	0.442854	0.514092	0.471876	0.490242	0.478249	0.4907	0.533017	0.541317	0.522765	0.458259	0.526972	0.50276	0.502031	0.504567	0.509395	0.534764	0.53237	0.522376	0.513685	0.515529	0.475969	0.422218	0.489279	0.507209	0.501971	0.500445	0.548619	0.489929	0.434785	0.487888	0.480282	0.492542	0.486204	0.478528
Angiogenesis	-0.08	0.315	0.627891	0.623789	0.660088	0.644031	0.636032	0.664028	0.658431	0.67425	0.687987	0.669857	0.663245	0.684884	0.607939	0.643182	0.670102	0.621522	0.643095	0.695858	0.641787	0.639289	0.63633	0.615211	0.61278	0.607417	0.63198	0.650238	0.635048	0.687996	0.648488	0.701958	0.625415	0.627304	0.613352	0.670541	0.642212	0.63683	0.661775	0.528781	0.6648	0.631663	0.65494	0.608244	0.673151	0.644376	0.668013	0.634079	0.635049
Phenylalanine_metabolism	-0.08	0.104	0.513024	0.442011	0.506377	0.508655	0.520412	0.520921	0.58111	0.480175	0.59704	0.547205	0.461098	0.569574	0.52458	0.463011	0.53389	0.455908	0.499372	0.476878	0.523506	0.523272	0.484749	0.505959	0.549946	0.52001	0.508256	0.53486	0.429672	0.544793	0.593903	0.570519	0.560879	0.507423	0.442206	0.537902	0.516757	0.534611	0.468141	0.496259	0.514199	0.517801	0.582913	0.43109	0.578724	0.537078	0.539333	0.515677	0.503265
Mucin_type_O_glycan_biosynthesis	-0.09	0.074	0.540084	0.495061	0.517232	0.547916	0.514487	0.578702	0.551127	0.554997	0.547096	0.562646	0.562485	0.55575	0.528559	0.514516	0.562091	0.506867	0.50957	0.568481	0.537764	0.58542	0.568343	0.548358	0.497088	0.544385	0.530124	0.556007	0.552122	0.570981	0.566851	0.587999	0.548361	0.537246	0.528708	0.532823	0.485928	0.562798	0.547882	0.52588	0.558788	0.559157	0.539245	0.474991	0.5782	0.55316	0.566133	0.520284	0.531103
Retinol_metabolism	-0.11	0.032	0.297097	0.115529	0.104285	0.191601	0.133906	0.185489	0.278912	0.109696	0.229027	0.275677	0.23469	0.315894	0.230607	0.0323541	0.275341	0.0908429	0.199238	0.0694205	0.290612	0.271238	0.174506	0.21376	0.14151	0.231255	0.210328	0.40026	0.0325497	0.247745	0.382604	0.253848	0.336168	0.158261	0.161236	0.187082	0.283461	0.302524	0.240652	0.263043	0.31177	0.152508	0.195583	0.0640798	0.115919	0.129169	0.213199	0.195794	0.188146
Steroid_hormone_biosynthesis	-0.11	0.036	0.317048	0.0388185	0.0678652	0.170219	0.152799	0.180175	0.288239	0.110318	0.199186	0.258755	0.217037	0.307378	0.170098	0.0580503	0.215542	0.0646094	0.190709	0.0436442	0.230315	0.244655	0.0890753	0.189579	0.116125	0.156593	0.169343	0.353211	0.0387087	0.204441	0.36317	0.179947	0.263367	0.153624	0.110793	0.163585	0.205599	0.276358	0.197053	0.176568	0.263826	0.0950593	0.158308	0.0452984	0.0944753	0.164967	0.130043	0.196501	0.139496
Tryptophan_metabolism	-0.11	0.038	0.510994	0.474389	0.510872	0.495601	0.484536	0.515649	0.493545	0.476947	0.541787	0.533216	0.515556	0.564929	0.516331	0.489716	0.526989	0.469721	0.48417	0.51812	0.507415	0.504898	0.530283	0.495014	0.492036	0.501938	0.461581	0.517697	0.483537	0.531543	0.539259	0.532081	0.539349	0.500817	0.519291	0.543238	0.468901	0.522968	0.48401	0.489085	0.550256	0.505601	0.501432	0.520151	0.533474	0.502691	0.524328	0.477729	0.492358
Degradation_of_ECM	-0.12	0.025	0.532763	0.481364	0.523957	0.554346	0.481972	0.582672	0.539849	0.555148	0.577293	0.576807	0.563623	0.565601	0.481715	0.463145	0.579152	0.524833	0.524312	0.596914	0.523009	0.546332	0.554697	0.513512	0.496287	0.498447	0.499524	0.521876	0.558876	0.601445	0.541909	0.60689	0.536079	0.521477	0.503649	0.546194	0.490022	0.561536	0.538949	0.451435	0.52806	0.579762	0.548118	0.487856	0.579695	0.52878	0.558434	0.547313	0.519902
Histidine_metabolism	-0.12	0.02	0.496703	0.475199	0.48301	0.516341	0.527225	0.52125	0.551967	0.4769	0.552096	0.554518	0.511663	0.555523	0.548272	0.477464	0.549256	0.465957	0.510016	0.52338	0.535625	0.545116	0.537856	0.523274	0.538613	0.540337	0.515205	0.550883	0.420338	0.55402	0.594481	0.551917	0.544845	0.541293	0.53528	0.526883	0.52627	0.552673	0.49261	0.528643	0.579137	0.526234	0.555581	0.450101	0.544606	0.484765	0.51112	0.527071	0.514893
Arachidonic_acid_metabolism	-0.13	0.009	0.420053	0.327398	0.416902	0.417789	0.404812	0.448847	0.472349	0.388311	0.466257	0.462339	0.426754	0.509096	0.421092	0.3008	0.455324	0.364821	0.388384	0.378871	0.411818	0.473882	0.443458	0.4243	0.328177	0.42239	0.433293	0.46447	0.329689	0.466058	0.535656	0.460034	0.49064	0.465577	0.445217	0.425376	0.412734	0.476663	0.427057	0.394335	0.477245	0.400913	0.49552	0.388819	0.435659	0.403411	0.405489	0.428099	0.388986
Glycosphingolipid_biosynthesis_ganglio_series	-0.13	0.01	0.416271	0.324797	0.483612	0.480046	0.426991	0.531648	0.45497	0.490218	0.51988	0.478614	0.464433	0.498776	0.383184	0.453274	0.494399	0.427288	0.447753	0.461767	0.450278	0.50077	0.499129	0.468199	0.383254	0.42278	0.439607	0.467061	0.488738	0.519821	0.50262	0.536571	0.453512	0.431045	0.430647	0.452706	0.392882	0.45834	0.458234	0.345923	0.441081	0.495047	0.484816	0.438081	0.513733	0.482863	0.507764	0.390297	0.454205
Fatty_acid_degradation	-0.14	0.008	0.56283	0.521043	0.55604	0.612337	0.582808	0.594518	0.566865	0.555418	0.601374	0.62262	0.576144	0.600026	0.584914	0.505066	0.606552	0.573153	0.538968	0.527521	0.602364	0.635874	0.584373	0.607515	0.538564	0.621574	0.601914	0.630443	0.56151	0.605098	0.613924	0.587805	0.606101	0.59518	0.603779	0.548151	0.582184	0.595058	0.570731	0.633267	0.612472	0.572693	0.552228	0.492009	0.5718	0.526002	0.627009	0.55194	0.587414
Metabolism_of_xenobiotics_by_cytochrome_P450	-0.16	0.002	0.388005	0.233443	0.181761	0.296322	0.239448	0.313276	0.391406	0.244799	0.356771	0.37978	0.327698	0.402132	0.345766	0.149457	0.382017	0.200515	0.312123	0.173779	0.398111	0.413796	0.282317	0.321178	0.277152	0.344466	0.309963	0.489283	0.150287	0.351059	0.481838	0.332168	0.402837	0.24964	0.26943	0.299255	0.373567	0.414728	0.320817	0.356912	0.398898	0.248902	0.325659	0.17565	0.263884	0.222138	0.322886	0.316939	0.258423
Primary_bile_acid_biosynthesis	-0.16	0.001	0.382149	0.254578	0.36523	0.39216	0.362623	0.409844	0.377744	0.354696	0.438513	0.42641	0.437467	0.497124	0.337725	0.349522	0.414015	0.341218	0.384964	0.358845	0.358129	0.415304	0.380908	0.370531	0.334237	0.293609	0.406213	0.37372	0.298074	0.431618	0.462191	0.440773	0.446705	0.416259	0.39161	0.424064	0.359586	0.419884	0.375973	0.319876	0.418266	0.333179	0.371371	0.330799	0.42061	0.347254	0.395692	0.283107	0.421876
ECM-relatted_genes	-0.17	0.001	0.450201	0.3687	0.431907	0.447857	0.378741	0.498644	0.431562	0.455798	0.438226	0.506433	0.436481	0.465564	0.262708	0.29949	0.469595	0.400081	0.380171	0.489951	0.374434	0.394489	0.47773	0.361819	0.34624	0.335661	0.337508	0.41054	0.45256	0.498007	0.44937	0.53328	0.480465	0.357588	0.37904	0.428846	0.344024	0.418728	0.368474	0.166135	0.474365	0.447578	0.45635	0.423176	0.504723	0.402587	0.493744	0.461116	0.426571
Glycosphingolipid_biosynthesis_globo_and_isoglobo_series	-0.17	0.001	0.50476	0.438397	0.52263	0.530184	0.49555	0.60672	0.589384	0.595583	0.635313	0.549337	0.580331	0.577019	0.551401	0.49181	0.596089	0.544579	0.527252	0.553954	0.549269	0.630391	0.591038	0.560603	0.528598	0.552368	0.517367	0.561084	0.559168	0.581037	0.597584	0.621794	0.590613	0.530349	0.506832	0.562466	0.460762	0.564503	0.584818	0.555068	0.567533	0.586839	0.588039	0.497154	0.567745	0.56042	0.590685	0.572954	0.50292
Nicotinate_and_nicotinamide_metabolism	-0.17	0.001	0.518578	0.482417	0.503306	0.547209	0.46469	0.561877	0.497563	0.532289	0.530457	0.545692	0.552045	0.569473	0.5101	0.436907	0.562949	0.522864	0.498422	0.513999	0.505508	0.578566	0.534816	0.527669	0.442292	0.507868	0.487171	0.589077	0.509724	0.566321	0.55692	0.567516	0.533177	0.519733	0.527877	0.538522	0.525641	0.574202	0.495557	0.484953	0.544586	0.52905	0.524104	0.480408	0.561987	0.51582	0.57554	0.50275	0.496295
Drug_metabolism_cytochrome_P450	-0.19	0.000254	0.362842	0.223216	0.184917	0.278541	0.220585	0.312319	0.385429	0.245493	0.345411	0.372301	0.317684	0.387435	0.335057	0.133746	0.386605	0.188554	0.288979	0.1881	0.385977	0.393094	0.258164	0.309454	0.260652	0.318688	0.292334	0.473508	0.143128	0.35379	0.456571	0.328671	0.402054	0.243851	0.250605	0.275664	0.369311	0.407342	0.31768	0.332672	0.412398	0.228961	0.323184	0.163406	0.249916	0.210317	0.329309	0.30874	0.242566
Taurine_and_hypotaurine_metabolism	-0.2	7.08e-05	0.507171	0.163193	0.401351	0.359843	0.420871	0.444312	0.490882	0.371982	0.439777	0.407041	0.347348	0.434969	0.33811	0.360436	0.472986	0.358694	0.359662	0.385838	0.367739	0.429608	0.419864	0.386618	0.37166	0.371715	0.391546	0.467801	0.340891	0.438693	0.436188	0.480528	0.483838	0.415488	0.415081	0.35098	0.361667	0.467134	0.424401	0.354218	0.461225	0.415718	0.464789	0.442404	0.439732	0.359688	0.392454	0.388839	0.38233
Tyrosine_metabolism	-0.2	0.000137	0.443112	0.360921	0.414203	0.460629	0.409139	0.475566	0.457666	0.414389	0.493083	0.498925	0.39941	0.490385	0.426658	0.30037	0.485718	0.397066	0.395579	0.376417	0.46484	0.469296	0.442431	0.439081	0.412707	0.450468	0.472032	0.473898	0.392124	0.456588	0.506864	0.484548	0.469883	0.425257	0.400562	0.43318	0.431198	0.450847	0.383062	0.439936	0.445251	0.450948	0.455881	0.346861	0.467059	0.393884	0.51364	0.425092	0.41292
TGFB	-0.31	8.7e-10	0.743732	0.701561	0.717464	0.730281	0.708829	0.751981	0.710163	0.759505	0.728845	0.738257	0.728626	0.73393	0.710517	0.723662	0.747937	0.714147	0.718393	0.744228	0.738187	0.736487	0.740755	0.703293	0.711918	0.719187	0.703466	0.738159	0.755461	0.758555	0.71997	0.752466	0.738236	0.702811	0.69401	0.730463	0.713407	0.719733	0.728915	0.702232	0.734487	0.737731	0.728081	0.731258	0.732935	0.725257	0.764068	0.733931	0.728384
[truncated: 328 more columns]
